# Supplementary material for: A facile access to a novel bidentate enantiomerically pure P,N-donor ligand
Source: Royal Society of Chemistry journal article supplement (doi:10.1039/b822144h), 2009-01-01
Supplement: b822144h.pdf [file b822144h.pdf]

**Table 1. Crystal data and structure refinement for 5.**

|                                                     |                                                                                   |                        |
|-----------------------------------------------------|-----------------------------------------------------------------------------------|------------------------|
| Empirical formula                                   | C <sub>32</sub> H <sub>24</sub> Cl <sub>2</sub> N <sub>3</sub> O <sub>3</sub> PPd |                        |
| Formula weight                                      | 706.81                                                                            |                        |
| Crystal colour and habit                            | yellow block                                                                      |                        |
| Crystal size (mm)                                   | 0.11 x 0.09 x 0.09                                                                |                        |
| Temperature (K)                                     | 150(2)                                                                            |                        |
| Wavelength (Å)                                      | 1.54184                                                                           |                        |
| Crystal system                                      | Monoclinic                                                                        |                        |
| Space group                                         | P2 <sub>1</sub>                                                                   |                        |
| Unit cell dimensions                                | <i>a</i> = 8.0871(3) Å                                                            | <i>α</i> = 90°         |
|                                                     | <i>b</i> = 13.8105(5) Å                                                           | <i>β</i> = 100.325(3)° |
|                                                     | <i>c</i> = 13.5808(4) Å                                                           | <i>γ</i> = 90°         |
| Volume (Å <sup>3</sup> )                            | 1492.24(9)                                                                        |                        |
| <i>Z</i>                                            | 2                                                                                 |                        |
| Calculated density (Mg/m <sup>3</sup> )             | 1.573                                                                             |                        |
| Absorption coefficient (mm <sup>-1</sup> )          | 7.490                                                                             |                        |
| F(000)                                              | 712                                                                               |                        |
| <i>θ</i> -range for data collection (°)             | 4.60/62.83                                                                        |                        |
| Index ranges                                        | -9 ≤ <i>h</i> ≤ 9, -15 ≤ <i>k</i> ≤ 13, -15 ≤ <i>l</i> ≤ 15                       |                        |
| Reflections collected                               | 16618                                                                             |                        |
| Independent reflections                             | 4115 ( <i>R</i> <sub>int</sub> = 0.0495)                                          |                        |
| Completeness to <i>θ</i> = 62.83°                   | 99.4 %                                                                            |                        |
| Absorption correction                               | Semi-empirical from equivalents (Multiscan)                                       |                        |
| Max. and min. transmission                          | 1.00000 and 0.58696                                                               |                        |
| Refinement method                                   | Full-matrix least-squares on F <sup>2</sup>                                       |                        |
| Data/restraints/parameters                          | 4115/1/381                                                                        |                        |
| Goodness-of-fit on F <sup>2</sup>                   | 1.022                                                                             |                        |
| Final <i>R</i> indices [ <i>I</i> > 2σ( <i>I</i> )] | <i>R</i> <sub>1</sub> = 0.0224, <i>wR</i> <sub>2</sub> = 0.0538                   |                        |
| <i>R</i> indices (all data)                         | <i>R</i> <sub>1</sub> = 0.0235, <i>wR</i> <sub>2</sub> = 0.0541                   |                        |
| Absolute structure parameter                        | -0.006(5)                                                                         |                        |
| Largest diff. Peak and hole (e·Å <sup>-3</sup> )    | 0.251/-0.415                                                                      |                        |

**Definitions:**

$$R_1 = \frac{\sum \|F_o\| - |F_c\|}{\sum |F_o\|}$$

$$wR_2 = \sqrt{\frac{\sum [w(F_o^2 - F_c^2)^2]}{\sum [w(F_o^2)^2]}}$$

$$Goof = \sqrt{\frac{\sum [w(F_o^2 - F_c^2)]}{(n - p)}}$$

*n* = number of reflections; *p* = number of parameters

**Notes on the refinement of 5.**

All hydrogen atom positions were calculated in deal positions (riding model).

**Table 2. Atomic coordinates [ $\times 10^4$ ] and equivalent isotropic displacement parameters [ $\text{\AA}^2 \times 10^3$ ] for 5.**

U(eq) is defined as one third of the trace of the orthogonalized  $U_{ij}$  tensor.

|       | x         | y        | z        | U(eq)  |
|-------|-----------|----------|----------|--------|
| C(1)  | 1471 (5)  | 8804 (3) | 6970 (3) | 36 (1) |
| C(2)  | 715 (5)   | 7916 (3) | 6962 (3) | 36 (1) |
| C(3)  | 1562 (3)  | 7318 (4) | 6386 (2) | 25 (1) |
| C(4)  | 3710 (5)  | 9542 (3) | 6161 (3) | 37 (1) |
| C(5)  | 1322 (4)  | 6294 (3) | 6153 (2) | 25 (1) |
| C(6)  | 1375 (4)  | 5902 (3) | 5217 (2) | 25 (1) |
| C(7)  | 1199 (5)  | 4923 (3) | 5019 (3) | 36 (1) |
| C(8)  | 883 (5)   | 4304 (3) | 5767 (3) | 42 (1) |
| C(9)  | 752 (5)   | 4677 (3) | 6697 (3) | 39 (1) |
| C(10) | 978 (5)   | 5661 (3) | 6890 (3) | 32 (1) |
| C(11) | 2690 (4)  | 6237 (3) | 2453 (3) | 25 (1) |
| C(12) | 2299 (4)  | 6984 (3) | 1797 (2) | 25 (1) |
| C(13) | 1034 (4)  | 6793 (3) | 914 (2)  | 26 (1) |
| C(14) | 405 (5)   | 5830 (3) | 738 (3)  | 29 (1) |
| C(15) | 981 (5)   | 5099 (3) | 1428 (3) | 31 (1) |
| C(16) | 2084 (4)  | 5286 (3) | 2287 (2) | 28 (1) |
| C(17) | 341 (4)   | 7539 (3) | 255 (2)  | 31 (1) |
| C(18) | -885 (4)  | 7336 (4) | -560 (2) | 36 (1) |
| C(19) | -1459 (5) | 6383 (3) | -757 (3) | 40 (1) |
| C(20) | -844 (5)  | 5655 (3) | -125 (3) | 36 (1) |
| C(21) | 3019 (4)  | 8401 (3) | 2901 (3) | 25 (1) |
| C(22) | 3075 (4)  | 7956 (3) | 2004 (2) | 24 (1) |
| C(23) | 3955 (4)  | 8446 (3) | 1319 (3) | 30 (1) |
| C(24) | 4635 (5)  | 9385 (3) | 1571 (3) | 36 (1) |
| C(25) | 4453 (5)  | 9811 (3) | 2491 (3) | 36 (1) |
| C(26) | 3671 (5)  | 9329 (3) | 3160 (3) | 32 (1) |
| C(27) | 4223 (5)  | 8009 (3) | 409 (3)  | 38 (1) |
| C(28) | 5057 (5)  | 8517 (4) | -226 (3) | 50 (1) |
| C(29) | 5689 (5)  | 9449 (4) | 17 (4)   | 54 (1) |
| C(30) | 5493 (5)  | 9866 (4) | 888 (3)  | 45 (1) |
| N(1)  | 2688 (4)  | 8752 (2) | 6432 (2) | 27 (1) |
| N(2)  | 2770 (3)  | 7848 (2) | 6073 (2) | 23 (1) |
| O(1)  | 1462 (3)  | 6519 (2) | 4395 (2) | 27 (1) |
| O(2)  | 3809 (3)  | 6404 (2) | 3369 (2) | 25 (1) |
| O(3)  | 2198 (3)  | 7935 (2) | 3589 (2) | 24 (1) |
| P(1)  | 3127 (1)  | 7027 (1) | 4198 (1) | 22 (1) |
| Cl(1) | 6393 (1)  | 7713 (1) | 7163 (1) | 33 (1) |
| Cl(2) | 7155 (1)  | 6823 (1) | 5003 (1) | 36 (1) |
| Pd(1) | 4852 (1)  | 7354 (1) | 5582 (1) | 20 (1) |
| C(31) | 7803 (5)  | 7430 (5) | 2382 (3) | 49 (1) |
| C(32) | 7121 (5)  | 6501 (4) | 2036 (3) | 41 (1) |
| N(3)  | 6572 (6)  | 5772 (3) | 1771 (3) | 60 (1) |

**Table 3. Bond lengths [Å] and angles [°] for 5.**

|             |          |                   |           |
|-------------|----------|-------------------|-----------|
| C(1)-N(1)   | 1.329(5) | C(30)-H(30)       | 0.9500    |
| C(1)-C(2)   | 1.369(6) | N(1)-N(2)         | 1.346(4)  |
| C(1)-H(1)   | 0.9500   | N(2)-Pd(1)        | 2.037(3)  |
| C(2)-C(3)   | 1.397(5) | O(1)-P(1)         | 1.583(2)  |
| C(2)-H(2)   | 0.9500   | O(2)-P(1)         | 1.592(2)  |
| C(3)-N(2)   | 1.349(5) | O(3)-P(1)         | 1.612(2)  |
| C(3)-C(5)   | 1.456(6) | P(1)-Pd(1)        | 2.1776(8) |
| C(4)-N(1)   | 1.455(5) | Cl(1)-Pd(1)       | 2.3347(8) |
| C(4)-H(4A)  | 0.9800   | Cl(2)-Pd(1)       | 2.2693(9) |
| C(4)-H(4B)  | 0.9800   | C(31)-C(32)       | 1.442(7)  |
| C(4)-H(4C)  | 0.9800   | C(31)-H(31A)      | 0.9800    |
| C(5)-C(6)   | 1.390(5) | C(31)-H(31B)      | 0.9800    |
| C(5)-C(10)  | 1.394(5) | C(31)-H(31C)      | 0.9800    |
| C(6)-C(7)   | 1.380(6) | C(32)-N(3)        | 1.132(6)  |
| C(6)-O(1)   | 1.416(4) |                   |           |
| C(7)-C(8)   | 1.386(6) | N(1)-C(1)-C(2)    | 108.7(4)  |
| C(7)-H(7)   | 0.9500   | N(1)-C(1)-H(1)    | 125.6     |
| C(8)-C(9)   | 1.385(6) | C(2)-C(1)-H(1)    | 125.6     |
| C(8)-H(8)   | 0.9500   | C(1)-C(2)-C(3)    | 105.7(3)  |
| C(9)-C(10)  | 1.390(6) | C(1)-C(2)-H(2)    | 127.2     |
| C(9)-H(9)   | 0.9500   | C(3)-C(2)-H(2)    | 127.2     |
| C(10)-H(10) | 0.9500   | N(2)-C(3)-C(2)    | 108.2(4)  |
| C(11)-C(12) | 1.363(5) | N(2)-C(3)-C(5)    | 122.3(3)  |
| C(11)-C(16) | 1.407(5) | C(2)-C(3)-C(5)    | 129.5(3)  |
| C(11)-O(2)  | 1.419(4) | N(1)-C(4)-H(4A)   | 109.5     |
| C(12)-C(13) | 1.454(5) | N(1)-C(4)-H(4B)   | 109.5     |
| C(12)-C(22) | 1.486(5) | H(4A)-C(4)-H(4B)  | 109.5     |
| C(13)-C(17) | 1.413(5) | N(1)-C(4)-H(4C)   | 109.5     |
| C(13)-C(14) | 1.429(5) | H(4A)-C(4)-H(4C)  | 109.5     |
| C(14)-C(15) | 1.399(5) | H(4B)-C(4)-H(4C)  | 109.5     |
| C(14)-C(20) | 1.424(5) | C(6)-C(5)-C(10)   | 117.1(4)  |
| C(15)-C(16) | 1.360(5) | C(6)-C(5)-C(3)    | 123.6(3)  |
| C(15)-H(15) | 0.9500   | C(10)-C(5)-C(3)   | 119.3(3)  |
| C(16)-H(16) | 0.9500   | C(7)-C(6)-C(5)    | 122.7(3)  |
| C(17)-C(18) | 1.377(5) | C(7)-C(6)-O(1)    | 117.0(3)  |
| C(17)-H(17) | 0.9500   | C(5)-C(6)-O(1)    | 120.0(3)  |
| C(18)-C(19) | 1.404(7) | C(6)-C(7)-C(8)    | 119.2(4)  |
| C(18)-H(18) | 0.9500   | C(6)-C(7)-H(7)    | 120.4     |
| C(19)-C(20) | 1.357(6) | C(8)-C(7)-H(7)    | 120.4     |
| C(19)-H(19) | 0.9500   | C(9)-C(8)-C(7)    | 119.5(4)  |
| C(20)-H(20) | 0.9500   | C(9)-C(8)-H(8)    | 120.2     |
| C(21)-C(22) | 1.372(5) | C(7)-C(8)-H(8)    | 120.2     |
| C(21)-O(3)  | 1.397(4) | C(8)-C(9)-C(10)   | 120.5(4)  |
| C(21)-C(26) | 1.406(6) | C(8)-C(9)-H(9)    | 119.8     |
| C(22)-C(23) | 1.439(5) | C(10)-C(9)-H(9)   | 119.8     |
| C(23)-C(24) | 1.425(6) | C(9)-C(10)-C(5)   | 120.9(4)  |
| C(23)-C(27) | 1.426(5) | C(9)-C(10)-H(10)  | 119.5     |
| C(24)-C(25) | 1.413(6) | C(5)-C(10)-H(10)  | 119.5     |
| C(24)-C(30) | 1.419(5) | C(12)-C(11)-C(16) | 124.6(3)  |
| C(25)-C(26) | 1.369(5) | C(12)-C(11)-O(2)  | 119.1(3)  |
| C(25)-H(25) | 0.9500   | C(16)-C(11)-O(2)  | 116.2(3)  |
| C(26)-H(26) | 0.9500   | C(11)-C(12)-C(13) | 116.6(3)  |
| C(27)-C(28) | 1.379(6) | C(11)-C(12)-C(22) | 121.3(3)  |
| C(27)-H(27) | 0.9500   | C(13)-C(12)-C(22) | 122.1(3)  |
| C(28)-C(29) | 1.402(7) | C(17)-C(13)-C(14) | 119.0(3)  |
| C(28)-H(28) | 0.9500   | C(17)-C(13)-C(12) | 122.0(3)  |
| C(29)-C(30) | 1.351(7) | C(14)-C(13)-C(12) | 118.9(3)  |
| C(29)-H(29) | 0.9500   | C(15)-C(14)-C(20) | 122.1(4)  |

|                   |            |                     |           |
|-------------------|------------|---------------------|-----------|
| C(15)-C(14)-C(13) | 119.6(3)   | O(1)-P(1)-Pd(1)     | 112.27(9) |
| C(20)-C(14)-C(13) | 118.3(3)   | O(2)-P(1)-Pd(1)     | 118.23(9) |
| C(16)-C(15)-C(14) | 121.7(4)   | O(3)-P(1)-Pd(1)     | 116.68(9) |
| C(16)-C(15)-H(15) | 119.1      | N(2)-Pd(1)-P(1)     | 84.98(8)  |
| C(14)-C(15)-H(15) | 119.1      | N(2)-Pd(1)-Cl(2)    | 178.71(9) |
| C(15)-C(16)-C(11) | 118.1(3)   | P(1)-Pd(1)-Cl(2)    | 94.16(3)  |
| C(15)-C(16)-H(16) | 120.9      | N(2)-Pd(1)-Cl(1)    | 87.96(8)  |
| C(11)-C(16)-H(16) | 120.9      | P(1)-Pd(1)-Cl(1)    | 172.57(3) |
| C(18)-C(17)-C(13) | 120.5(4)   | Cl(2)-Pd(1)-Cl(1)   | 92.93(3)  |
| C(18)-C(17)-H(17) | 119.8      | C(32)-C(31)-H(31A)  | 109.5     |
| C(13)-C(17)-H(17) | 119.8      | C(32)-C(31)-H(31B)  | 109.5     |
| C(17)-C(18)-C(19) | 120.7(4)   | H(31A)-C(31)-H(31B) | 109.5     |
| C(17)-C(18)-H(18) | 119.7      | C(32)-C(31)-H(31C)  | 109.5     |
| C(19)-C(18)-H(18) | 119.7      | H(31A)-C(31)-H(31C) | 109.5     |
| C(20)-C(19)-C(18) | 120.1(3)   | H(31B)-C(31)-H(31C) | 109.5     |
| C(20)-C(19)-H(19) | 119.9      | N(3)-C(32)-C(31)    | 179.2(5)  |
| C(18)-C(19)-H(19) | 119.9      |                     |           |
| C(19)-C(20)-C(14) | 121.4(4)   |                     |           |
| C(19)-C(20)-H(20) | 119.3      |                     |           |
| C(14)-C(20)-H(20) | 119.3      |                     |           |
| C(22)-C(21)-O(3)  | 118.9(3)   |                     |           |
| C(22)-C(21)-C(26) | 124.0(3)   |                     |           |
| O(3)-C(21)-C(26)  | 117.0(3)   |                     |           |
| C(21)-C(22)-C(23) | 117.5(3)   |                     |           |
| C(21)-C(22)-C(12) | 119.5(3)   |                     |           |
| C(23)-C(22)-C(12) | 122.9(3)   |                     |           |
| C(24)-C(23)-C(27) | 118.8(3)   |                     |           |
| C(24)-C(23)-C(22) | 119.2(3)   |                     |           |
| C(27)-C(23)-C(22) | 122.0(4)   |                     |           |
| C(25)-C(24)-C(30) | 121.5(4)   |                     |           |
| C(25)-C(24)-C(23) | 119.6(3)   |                     |           |
| C(30)-C(24)-C(23) | 118.8(4)   |                     |           |
| C(26)-C(25)-C(24) | 121.2(4)   |                     |           |
| C(26)-C(25)-H(25) | 119.4      |                     |           |
| C(24)-C(25)-H(25) | 119.4      |                     |           |
| C(25)-C(26)-C(21) | 118.3(4)   |                     |           |
| C(25)-C(26)-H(26) | 120.8      |                     |           |
| C(21)-C(26)-H(26) | 120.8      |                     |           |
| C(28)-C(27)-C(23) | 119.6(4)   |                     |           |
| C(28)-C(27)-H(27) | 120.2      |                     |           |
| C(23)-C(27)-H(27) | 120.2      |                     |           |
| C(27)-C(28)-C(29) | 121.2(4)   |                     |           |
| C(27)-C(28)-H(28) | 119.4      |                     |           |
| C(29)-C(28)-H(28) | 119.4      |                     |           |
| C(30)-C(29)-C(28) | 120.2(4)   |                     |           |
| C(30)-C(29)-H(29) | 119.9      |                     |           |
| C(28)-C(29)-H(29) | 119.9      |                     |           |
| C(29)-C(30)-C(24) | 121.3(4)   |                     |           |
| C(29)-C(30)-H(30) | 119.3      |                     |           |
| C(24)-C(30)-H(30) | 119.3      |                     |           |
| C(1)-N(1)-N(2)    | 109.8(3)   |                     |           |
| C(1)-N(1)-C(4)    | 127.5(3)   |                     |           |
| N(2)-N(1)-C(4)    | 122.4(3)   |                     |           |
| N(1)-N(2)-C(3)    | 107.6(3)   |                     |           |
| N(1)-N(2)-Pd(1)   | 121.8(2)   |                     |           |
| C(3)-N(2)-Pd(1)   | 127.6(3)   |                     |           |
| C(6)-O(1)-P(1)    | 124.3(2)   |                     |           |
| C(11)-O(2)-P(1)   | 117.4(2)   |                     |           |
| C(21)-O(3)-P(1)   | 117.9(2)   |                     |           |
| O(1)-P(1)-O(2)    | 107.01(13) |                     |           |
| O(1)-P(1)-O(3)    | 95.71(13)  |                     |           |
| O(2)-P(1)-O(3)    | 104.25(12) |                     |           |

---

**Table 4. Anisotropic displacement parameters [ $\text{\AA}^2 \times 10^3$ ] for 5.**  
 The anisotropic displacement factor exponent takes the form:  
 $-2\pi^2[(ha^*)^2U_{11} + \dots + 2hka^*b^*U_{12}]$

|        | U11    | U22    | U33    | U23     | U13    | U12    |
|--------|--------|--------|--------|---------|--------|--------|
| C (1)  | 30 (2) | 39 (3) | 42 (2) | -7 (2)  | 14 (2) | 4 (2)  |
| C (2)  | 28 (2) | 45 (3) | 38 (2) | -4 (2)  | 16 (2) | 0 (2)  |
| C (3)  | 19 (1) | 34 (2) | 22 (1) | 0 (2)   | 3 (1)  | -1 (2) |
| C (4)  | 41 (2) | 30 (2) | 44 (2) | -1 (2)  | 15 (2) | 0 (2)  |
| C (5)  | 15 (2) | 30 (2) | 29 (2) | 4 (2)   | 2 (1)  | -3 (1) |
| C (6)  | 20 (2) | 31 (2) | 25 (2) | 4 (2)   | 2 (1)  | -5 (2) |
| C (7)  | 36 (2) | 35 (2) | 35 (2) | -5 (2)  | 3 (2)  | -7 (2) |
| C (8)  | 42 (2) | 26 (2) | 59 (3) | 3 (2)   | 11 (2) | -9 (2) |
| C (9)  | 40 (2) | 38 (2) | 40 (2) | 15 (2)  | 9 (2)  | -8 (2) |
| C (10) | 28 (2) | 43 (3) | 25 (2) | 5 (2)   | 6 (2)  | -5 (2) |
| C (11) | 21 (2) | 34 (2) | 22 (2) | -5 (2)  | 8 (2)  | 5 (2)  |
| C (12) | 27 (2) | 29 (2) | 19 (2) | 0 (1)   | 7 (1)  | 3 (1)  |
| C (13) | 28 (2) | 32 (2) | 20 (2) | 0 (2)   | 6 (1)  | 1 (2)  |
| C (14) | 30 (2) | 36 (2) | 22 (2) | 0 (2)   | 7 (1)  | 4 (2)  |
| C (15) | 36 (2) | 27 (2) | 31 (2) | -4 (2)  | 10 (2) | 0 (2)  |
| C (16) | 30 (2) | 30 (2) | 24 (2) | 1 (2)   | 7 (2)  | 9 (2)  |
| C (17) | 34 (2) | 34 (3) | 24 (2) | 5 (2)   | 4 (1)  | -3 (2) |
| C (18) | 38 (2) | 40 (2) | 27 (2) | 9 (2)   | -3 (1) | 0 (2)  |
| C (19) | 40 (2) | 49 (3) | 25 (2) | 1 (2)   | -9 (2) | -7 (2) |
| C (20) | 42 (2) | 35 (2) | 30 (2) | -6 (2)  | 3 (2)  | -6 (2) |
| C (21) | 23 (2) | 29 (2) | 22 (2) | 6 (2)   | 1 (2)  | 2 (2)  |
| C (22) | 20 (2) | 31 (2) | 21 (2) | 4 (2)   | 2 (1)  | 2 (2)  |
| C (23) | 22 (2) | 38 (2) | 27 (2) | 9 (2)   | 1 (1)  | 1 (2)  |
| C (24) | 24 (2) | 43 (3) | 38 (2) | 15 (2)  | 1 (2)  | -2 (2) |
| C (25) | 32 (2) | 32 (2) | 41 (2) | 8 (2)   | -4 (2) | -6 (2) |
| C (26) | 34 (2) | 32 (2) | 28 (2) | 2 (2)   | -1 (2) | 2 (2)  |
| C (27) | 32 (2) | 59 (3) | 23 (2) | 5 (2)   | 7 (2)  | -2 (2) |
| C (28) | 38 (2) | 83 (4) | 31 (2) | 12 (2)  | 12 (2) | 1 (2)  |
| C (29) | 37 (2) | 76 (4) | 50 (3) | 31 (3)  | 12 (2) | -5 (2) |
| C (30) | 34 (2) | 52 (3) | 45 (3) | 21 (2)  | 1 (2)  | -8 (2) |
| N (1)  | 26 (2) | 27 (2) | 29 (1) | -3 (1)  | 9 (1)  | 0 (1)  |
| N (2)  | 21 (1) | 26 (2) | 23 (1) | 0 (1)   | 5 (1)  | -2 (1) |
| O (1)  | 25 (1) | 32 (1) | 23 (1) | 2 (1)   | 1 (1)  | -5 (1) |
| O (2)  | 26 (1) | 30 (1) | 20 (1) | -1 (1)  | 2 (1)  | 9 (1)  |
| O (3)  | 24 (1) | 29 (1) | 21 (1) | 3 (1)   | 6 (1)  | 5 (1)  |
| P (1)  | 21 (1) | 26 (1) | 18 (1) | 1 (1)   | 2 (1)  | 1 (1)  |
| Cl (1) | 28 (1) | 45 (1) | 23 (1) | -2 (1)  | -1 (1) | -1 (1) |
| Cl (2) | 23 (1) | 47 (1) | 38 (1) | -13 (1) | 7 (1)  | 3 (1)  |
| Pd (1) | 19 (1) | 25 (1) | 18 (1) | 0 (1)   | 3 (1)  | -1 (1) |
| C (31) | 37 (2) | 59 (3) | 49 (2) | -7 (3)  | 4 (2)  | 1 (3)  |
| C (32) | 43 (2) | 50 (3) | 30 (2) | 5 (2)   | 8 (2)  | 2 (2)  |
| N (3)  | 76 (3) | 57 (3) | 48 (2) | -3 (2)  | 14 (2) | -3 (2) |

**Table 5. Hydrogen coordinates [ $\times 10^4$ ] and isotropic displacement parameters [ $\text{\AA}^2 \times 10^3$ ] for 5.**

|        | x     | y     | z     | U(eq) |
|--------|-------|-------|-------|-------|
| H(1)   | 1174  | 9364  | 7305  | 43    |
| H(2)   | -196  | 7742  | 7281  | 43    |
| H(4A)  | 3016  | 9961  | 5670  | 56    |
| H(4B)  | 4640  | 9277  | 5871  | 56    |
| H(4C)  | 4161  | 9919  | 6760  | 56    |
| H(7)   | 1293  | 4677  | 4378  | 43    |
| H(8)   | 757   | 3629  | 5643  | 51    |
| H(9)   | 505   | 4258  | 7206  | 47    |
| H(10)  | 897   | 5906  | 7533  | 38    |
| H(15)  | 591   | 4455  | 1293  | 37    |
| H(16)  | 2436  | 4788  | 2760  | 34    |
| H(17)  | 725   | 8186  | 376   | 37    |
| H(18)  | -1349 | 7845  | -994  | 43    |
| H(19)  | -2280 | 6248  | -1334 | 48    |
| H(20)  | -1256 | 5016  | -261  | 43    |
| H(25)  | 4881  | 10444 | 2648  | 43    |
| H(26)  | 3572  | 9614  | 3783  | 39    |
| H(27)  | 3829  | 7371  | 242   | 45    |
| H(28)  | 5207  | 8230  | -840  | 60    |
| H(29)  | 6256  | 9788  | -433  | 65    |
| H(30)  | 5939  | 10495 | 1048  | 53    |
| H(31A) | 7200  | 7679  | 2893  | 73    |
| H(31B) | 7675  | 7884  | 1818  | 73    |
| H(31C) | 8998  | 7360  | 2669  | 73    |

**Table 1. Crystal data and structure refinement for 6.**

|                                                     |                                                                                     |                |
|-----------------------------------------------------|-------------------------------------------------------------------------------------|----------------|
| Empirical formula                                   | C <sub>49</sub> H <sub>47</sub> Cl <sub>2</sub> N <sub>2</sub> O <sub>3.5</sub> PRu |                |
| Formula weight                                      | 922.83                                                                              |                |
| Crystal colour and habit                            | red prism                                                                           |                |
| Crystal size (mm)                                   | 0.30 x 0.30 x 0.21                                                                  |                |
| Temperature (K)                                     | 150(2)                                                                              |                |
| Wavelength (Å)                                      | 1.54184                                                                             |                |
| Crystal system                                      | Tetragonal                                                                          |                |
| Space group                                         | P4 <sub>3</sub> 2 <sub>1</sub> 2                                                    |                |
| Unit cell dimensions                                | <i>a</i> = 15.80010(10) Å                                                           | <i>α</i> = 90° |
|                                                     | <i>b</i> = 15.80010(10) Å                                                           | <i>β</i> = 90° |
|                                                     | <i>c</i> = 35.7434(4) Å                                                             | <i>γ</i> = 90° |
| Volume (Å <sup>3</sup> )                            | 8923.10(13)                                                                         |                |
| <i>Z</i>                                            | 8                                                                                   |                |
| Calculated density (Mg/m <sup>3</sup> )             | 1.374                                                                               |                |
| Absorption coefficient (mm <sup>-1</sup> )          | 4.636                                                                               |                |
| <i>F</i> (000)                                      | 3808                                                                                |                |
| <i>θ</i> -range for data collection (°)             | 3.73/62.59                                                                          |                |
| Index ranges                                        | -17 ≤ <i>h</i> ≤ 18, -16 ≤ <i>k</i> ≤ 16, -33 ≤ <i>l</i> ≤ 40                       |                |
| Reflections collected                               | 27147                                                                               |                |
| Independent reflections                             | 6661 ( <i>R</i> <sub>int</sub> = 0.0396)                                            |                |
| Completeness to <i>θ</i> = 62.59°                   | 95.6 %                                                                              |                |
| Absorption correction                               | Semi-empirical from equivalents (Multiscan)                                         |                |
| Max. and min. transmission                          | 1.00000 and 0.51880                                                                 |                |
| Refinement method                                   | Full-matrix least-squares on <i>F</i> <sup>2</sup>                                  |                |
| Data/restraints/parameters                          | 6661/321/622                                                                        |                |
| Goodness-of-fit on <i>F</i> <sup>2</sup>            | 1.104                                                                               |                |
| Final <i>R</i> indices [ <i>I</i> > 2σ( <i>I</i> )] | <i>R</i> <sub>1</sub> = 0.0405, <i>wR</i> <sub>2</sub> = 0.0989                     |                |
| <i>R</i> indices (all data)                         | <i>R</i> <sub>1</sub> = 0.0452, <i>wR</i> <sub>2</sub> = 0.1005                     |                |
| Absolute structure parameter                        | 0.033(11)                                                                           |                |
| Largest diff. Peak and hole (e·Å <sup>-3</sup> )    | 0.550/-0.507                                                                        |                |

**Definitions:**

$$R_1 = \frac{\sum \|F_o\| - |F_c\|}{\sum |F_o|}$$

$$wR_2 = \sqrt{\frac{\sum [w(F_o^2 - F_c^2)^2]}{\sum [w(F_o^2)^2]}}$$

$$Goof = \sqrt{\frac{\sum [w(F_o^2 - F_c^2)]}{(n - p)}} \quad n = \text{number of reflections}; p = \text{number of parameters}$$

**Notes on the refinement of 6.**

All hydrogen atom positions were calculated in deal positions (riding model). The target molecule was crystallized with 1 molecule of toluene and 0.5 molecule of THF, both of which were disordered.

**Table 2. Atomic coordinates [ $\times 10^4$ ] and equivalent isotropic displacement parameters [ $\text{\AA}^2 \times 10^3$ ] for 6.**

U(eq) is defined as one third of the trace of the orthogonalized  $U_{ij}$  tensor.

|        | x        | y        | z        | U(eq)   |
|--------|----------|----------|----------|---------|
| C(1)   | 6077(4)  | 1670(5)  | 4739(2)  | 57(2)   |
| C(2)   | 5555(4)  | 1270(4)  | 4491(2)  | 43(1)   |
| C(3)   | 5171(3)  | 1922(3)  | 4286(1)  | 36(1)   |
| C(4)   | 6457(5)  | 3211(5)  | 4859(2)  | 78(2)   |
| C(5)   | 4534(4)  | 1878(3)  | 3984(2)  | 39(1)   |
| C(6)   | 4612(3)  | 1348(3)  | 3676(1)  | 30(1)   |
| C(7)   | 4016(4)  | 1335(4)  | 3392(2)  | 40(1)   |
| C(8)   | 3324(4)  | 1861(4)  | 3415(2)  | 47(1)   |
| C(9)   | 3229(4)  | 2384(4)  | 3716(2)  | 52(2)   |
| C(10)  | 3823(4)  | 2410(4)  | 3997(2)  | 50(2)   |
| C(11)  | 6029(3)  | -862(3)  | 3702(1)  | 27(1)   |
| C(12)  | 5642(3)  | -1461(3) | 3481(1)  | 29(1)   |
| C(13)  | 5121(3)  | -2073(3) | 3660(1)  | 31(1)   |
| C(14)  | 5079(3)  | -2079(3) | 4055(2)  | 33(1)   |
| C(15)  | 5558(3)  | -1494(3) | 4270(1)  | 29(1)   |
| C(16)  | 6017(3)  | -892(3)  | 4090(1)  | 28(1)   |
| C(17)  | 4605(4)  | -2645(3) | 3458(2)  | 38(1)   |
| C(18)  | 4072(4)  | -3193(4) | 3640(2)  | 51(2)   |
| C(19)  | 4038(4)  | -3198(4) | 4034(2)  | 52(2)   |
| C(20)  | 4523(4)  | -2658(4) | 4237(2)  | 42(1)   |
| C(21)  | 5509(3)  | -692(3)  | 2879(1)  | 28(1)   |
| C(22)  | 5732(3)  | -1418(3) | 3062(1)  | 28(1)   |
| C(23)  | 6062(3)  | -2103(3) | 2849(1)  | 32(1)   |
| C(24)  | 6098(3)  | -2025(4) | 2450(1)  | 37(1)   |
| C(25)  | 5802(4)  | -1283(4) | 2279(2)  | 39(1)   |
| C(26)  | 5526(3)  | -613(3)  | 2489(1)  | 34(1)   |
| C(27)  | 6400(4)  | -2841(4) | 3016(2)  | 43(1)   |
| C(28)  | 6746(4)  | -3475(4) | 2802(2)  | 50(2)   |
| C(29)  | 6772(4)  | -3398(4) | 2411(2)  | 53(2)   |
| C(30)  | 6449(4)  | -2702(4) | 2241(2)  | 48(2)   |
| C(31)  | 6645(4)  | 2937(4)  | 3239(2)  | 49(2)   |
| C(32)  | 7382(4)  | 2812(4)  | 2999(2)  | 49(2)   |
| C(33)  | 7969(4)  | 2212(4)  | 3074(2)  | 45(2)   |
| C(34)  | 7917(4)  | 1662(5)  | 3392(2)  | 57(2)   |
| C(35)  | 7220(4)  | 1821(4)  | 3637(2)  | 53(2)   |
| C(36)  | 6607(5)  | 2453(4)  | 3561(2)  | 52(2)   |
| C(37)  | 5998(5)  | 3613(4)  | 3137(2)  | 63(2)   |
| C(38)  | 5166(5)  | 3555(5)  | 3340(2)  | 74(2)   |
| C(39)  | 6403(7)  | 4491(5)  | 3185(3)  | 130(5)  |
| C(40)  | 8543(5)  | 990(5)   | 3459(2)  | 66(2)   |
| N(1)   | 6003(4)  | 2506(4)  | 4678(1)  | 54(1)   |
| N(2)   | 5449(3)  | 2681(3)  | 4400(1)  | 48(1)   |
| O(1)   | 5298(2)  | 781(2)   | 3678(1)  | 28(1)   |
| O(2)   | 6464(2)  | -177(2)  | 3534(1)  | 26(1)   |
| O(3)   | 5244(2)  | 5(2)     | 3083(1)  | 28(1)   |
| P(1)   | 5905(1)  | 543(1)   | 3337(1)  | 26(1)   |
| Cl(1)  | 7291(1)  | 459(1)   | 2708(1)  | 39(1)   |
| Cl(2)  | 5624(1)  | 1777(1)  | 2623(1)  | 40(1)   |
| Ru(1)  | 6715(1)  | 1558(1)  | 3089(1)  | 34(1)   |
| C(41A) | 4054(9)  | 6894(9)  | 2315(4)  | 138(6)  |
| C(42A) | 3225(10) | 7338(9)  | 2377(4)  | 183(8)  |
| O(4A)  | 3969(8)  | 6031(8)  | 2500     | 158(6)  |
| C(41B) | 4600(30) | 5890(40) | 2186(8)  | 146(12) |
| C(42B) | 3940(50) | 6550(40) | 2341(18) | 141(12) |



|         |           |           |           |          |
|---------|-----------|-----------|-----------|----------|
| O (4B)  | 4660 (30) | 5340 (30) | 2500      | 146 (13) |
| C (43A) | 3512 (19) | 4595 (17) | 4387 (7)  | 107 (7)  |
| C (44A) | 3171 (14) | 4636 (15) | 4035 (7)  | 96 (7)   |
| C (45A) | 2325 (13) | 4501 (12) | 4026 (7)  | 85 (5)   |
| C (46A) | 1953 (18) | 4370 (20) | 4361 (7)  | 105 (7)  |
| C (47A) | 2262 (17) | 4266 (18) | 4701 (7)  | 136 (8)  |
| C (48A) | 3088 (16) | 4451 (13) | 4706 (7)  | 109 (6)  |
| C (49A) | 4460 (20) | 4780 (30) | 4421 (12) | 227 (17) |
| C (43B) | 3347 (14) | 4560 (13) | 4233 (5)  | 98 (5)   |
| C (44B) | 3190 (9)  | 4727 (11) | 3865 (4)  | 84 (5)   |
| C (45B) | 2371 (9)  | 4657 (8)  | 3709 (4)  | 90 (4)   |
| C (46B) | 1705 (10) | 4402 (9)  | 3918 (5)  | 100 (5)  |
| C (47B) | 1879 (15) | 4218 (19) | 4302 (6)  | 120 (6)  |
| C (48B) | 2681 (12) | 4323 (11) | 4472 (5)  | 111 (5)  |
| C (49B) | 4159 (16) | 4647 (13) | 4388 (7)  | 159 (8)  |

---

Table 3. Bond lengths [Å] and angles [°] for 6.

|             |          |                 |            |
|-------------|----------|-----------------|------------|
| C(1)-N(1)   | 1.343(9) | C(30)-H(30)     | 0.9500     |
| C(1)-C(2)   | 1.366(8) | C(31)-C(36)     | 1.383(8)   |
| C(1)-H(1)   | 0.9500   | C(31)-C(32)     | 1.460(9)   |
| C(2)-C(3)   | 1.400(8) | C(31)-C(37)     | 1.522(9)   |
| C(2)-H(2)   | 0.9500   | C(31)-Ru(1)     | 2.247(6)   |
| C(3)-N(2)   | 1.340(7) | C(32)-C(33)     | 1.353(9)   |
| C(3)-C(5)   | 1.480(8) | C(32)-Ru(1)     | 2.266(6)   |
| C(4)-N(1)   | 1.474(8) | C(32)-H(32)     | 0.9500     |
| C(4)-H(4A)  | 0.9800   | C(33)-C(34)     | 1.431(8)   |
| C(4)-H(4B)  | 0.9800   | C(33)-Ru(1)     | 2.235(5)   |
| C(4)-H(4C)  | 0.9800   | C(33)-H(33)     | 0.9500     |
| C(5)-C(6)   | 1.387(7) | C(34)-C(35)     | 1.430(9)   |
| C(5)-C(10)  | 1.403(8) | C(34)-C(40)     | 1.472(10)  |
| C(6)-C(7)   | 1.385(7) | C(34)-Ru(1)     | 2.191(6)   |
| C(6)-O(1)   | 1.406(6) | C(35)-C(36)     | 1.418(10)  |
| C(7)-C(8)   | 1.376(8) | C(35)-Ru(1)     | 2.156(5)   |
| C(7)-H(7)   | 0.9500   | C(35)-H(35)     | 0.9500     |
| C(8)-C(9)   | 1.366(8) | C(36)-Ru(1)     | 2.208(6)   |
| C(8)-H(8)   | 0.9500   | C(36)-H(36)     | 0.9500     |
| C(9)-C(10)  | 1.375(9) | C(37)-C(38)     | 1.504(10)  |
| C(9)-H(9)   | 0.9500   | C(37)-C(39)     | 1.538(9)   |
| C(10)-H(10) | 0.9500   | C(37)-H(37)     | 1.0000     |
| C(11)-C(12) | 1.376(7) | C(38)-H(38A)    | 0.9800     |
| C(11)-C(16) | 1.386(6) | C(38)-H(38B)    | 0.9800     |
| C(11)-O(2)  | 1.416(6) | C(38)-H(38C)    | 0.9800     |
| C(12)-C(13) | 1.423(7) | C(39)-H(39A)    | 0.9800     |
| C(12)-C(22) | 1.503(7) | C(39)-H(39B)    | 0.9800     |
| C(13)-C(14) | 1.414(7) | C(39)-H(39C)    | 0.9800     |
| C(13)-C(17) | 1.416(7) | C(40)-H(40A)    | 0.9800     |
| C(14)-C(15) | 1.419(7) | C(40)-H(40B)    | 0.9800     |
| C(14)-C(20) | 1.426(8) | C(40)-H(40C)    | 0.9800     |
| C(15)-C(16) | 1.359(7) | N(1)-N(2)       | 1.353(7)   |
| C(15)-H(15) | 0.9500   | O(1)-P(1)       | 1.598(3)   |
| C(16)-H(16) | 0.9500   | O(2)-P(1)       | 1.605(3)   |
| C(17)-C(18) | 1.370(8) | O(3)-P(1)       | 1.623(3)   |
| C(17)-H(17) | 0.9500   | P(1)-Ru(1)      | 2.2351(13) |
| C(18)-C(19) | 1.412(8) | Cl(1)-Ru(1)     | 2.3876(15) |
| C(18)-H(18) | 0.9500   | Cl(2)-Ru(1)     | 2.4211(14) |
| C(19)-C(20) | 1.356(8) | C(41A)-C(42A)   | 1.502(15)  |
| C(19)-H(19) | 0.9500   | C(41A)-O(4A)    | 1.521(13)  |
| C(20)-H(20) | 0.9500   | C(41A)-H(41A)   | 0.9900     |
| C(21)-C(22) | 1.368(7) | C(41A)-H(41B)   | 0.9900     |
| C(21)-O(3)  | 1.386(6) | C(42A)-C(42A)#1 | 1.535(18)  |
| C(21)-C(26) | 1.398(7) | C(42A)-H(42A)   | 0.9900     |
| C(22)-C(23) | 1.424(7) | C(42A)-H(42B)   | 0.9900     |
| C(23)-C(27) | 1.415(7) | O(4A)-C(41A)#1  | 1.521(13)  |
| C(23)-C(24) | 1.430(7) | C(41B)-O(4B)    | 1.430(19)  |
| C(24)-C(25) | 1.403(8) | C(41B)-C(42B)   | 1.57(2)    |
| C(24)-C(30) | 1.418(8) | C(41B)-H(41C)   | 0.9900     |
| C(25)-C(26) | 1.369(8) | C(41B)-H(41D)   | 0.9900     |
| C(25)-H(25) | 0.9500   | C(42B)-C(42B)#1 | 1.57(2)    |
| C(26)-H(26) | 0.9500   | C(42B)-H(42C)   | 0.9900     |
| C(27)-C(28) | 1.376(8) | C(42B)-H(42D)   | 0.9900     |
| C(27)-H(27) | 0.9500   | O(4B)-C(41B)#1  | 1.430(19)  |
| C(28)-C(29) | 1.404(8) | C(43A)-C(48A)   | 1.341(17)  |
| C(28)-H(28) | 0.9500   | C(43A)-C(44A)   | 1.368(16)  |
| C(29)-C(30) | 1.354(9) | C(43A)-C(49A)   | 1.54(4)    |
| C(29)-H(29) | 0.9500   | C(44A)-C(45A)   | 1.354(17)  |

|                   |           |                   |          |
|-------------------|-----------|-------------------|----------|
| C(44A)-H(44A)     | 0.9500    | C(16)-C(11)-O(2)  | 117.1(4) |
| C(45A)-C(46A)     | 1.347(16) | C(11)-C(12)-C(13) | 117.8(4) |
| C(45A)-H(45A)     | 0.9500    | C(11)-C(12)-C(22) | 120.0(4) |
| C(46A)-C(47A)     | 1.320(16) | C(13)-C(12)-C(22) | 122.1(4) |
| C(46A)-H(46A)     | 0.9500    | C(14)-C(13)-C(17) | 118.6(5) |
| C(47A)-C(48A)     | 1.337(17) | C(14)-C(13)-C(12) | 118.7(5) |
| C(47A)-H(47A)     | 0.9500    | C(17)-C(13)-C(12) | 122.6(5) |
| C(48A)-H(48A)     | 0.9500    | C(13)-C(14)-C(15) | 120.7(5) |
| C(49A)-H(49A)     | 0.9800    | C(13)-C(14)-C(20) | 119.3(5) |
| C(49A)-H(49B)     | 0.9800    | C(15)-C(14)-C(20) | 119.9(5) |
| C(49A)-H(49C)     | 0.9800    | C(16)-C(15)-C(14) | 119.0(4) |
| C(43B)-C(44B)     | 1.363(13) | C(16)-C(15)-H(15) | 120.5    |
| C(43B)-C(49B)     | 1.41(3)   | C(14)-C(15)-H(15) | 120.5    |
| C(43B)-C(48B)     | 1.407(15) | C(15)-C(16)-C(11) | 120.3(5) |
| C(44B)-C(45B)     | 1.414(14) | C(15)-C(16)-H(16) | 119.9    |
| C(44B)-H(44B)     | 0.9500    | C(11)-C(16)-H(16) | 119.9    |
| C(45B)-C(46B)     | 1.350(13) | C(18)-C(17)-C(13) | 121.0(5) |
| C(45B)-H(45B)     | 0.9500    | C(18)-C(17)-H(17) | 119.5    |
| C(46B)-C(47B)     | 1.433(14) | C(13)-C(17)-H(17) | 119.5    |
| C(46B)-H(46B)     | 0.9500    | C(17)-C(18)-C(19) | 120.1(6) |
| C(47B)-C(48B)     | 1.414(15) | C(17)-C(18)-H(18) | 120.0    |
| C(47B)-H(47B)     | 0.9500    | C(19)-C(18)-H(18) | 120.0    |
| C(48B)-H(48B)     | 0.9500    | C(20)-C(19)-C(18) | 120.5(6) |
| C(49B)-H(49D)     | 0.9800    | C(20)-C(19)-H(19) | 119.7    |
| C(49B)-H(49E)     | 0.9800    | C(18)-C(19)-H(19) | 119.7    |
| C(49B)-H(49F)     | 0.9800    | C(19)-C(20)-C(14) | 120.5(5) |
|                   |           | C(19)-C(20)-H(20) | 119.7    |
| N(1)-C(1)-C(2)    | 107.3(6)  | C(14)-C(20)-H(20) | 119.7    |
| N(1)-C(1)-H(1)    | 126.3     | C(22)-C(21)-O(3)  | 119.4(4) |
| C(2)-C(1)-H(1)    | 126.3     | C(22)-C(21)-C(26) | 123.2(5) |
| C(1)-C(2)-C(3)    | 105.1(5)  | O(3)-C(21)-C(26)  | 117.4(4) |
| C(1)-C(2)-H(2)    | 127.5     | C(21)-C(22)-C(23) | 118.3(4) |
| C(3)-C(2)-H(2)    | 127.5     | C(21)-C(22)-C(12) | 119.4(4) |
| N(2)-C(3)-C(2)    | 111.0(5)  | C(23)-C(22)-C(12) | 122.3(4) |
| N(2)-C(3)-C(5)    | 119.1(5)  | C(27)-C(23)-C(22) | 122.5(5) |
| C(2)-C(3)-C(5)    | 129.9(5)  | C(27)-C(23)-C(24) | 118.5(5) |
| N(1)-C(4)-H(4A)   | 109.5     | C(22)-C(23)-C(24) | 118.9(5) |
| N(1)-C(4)-H(4B)   | 109.5     | C(25)-C(24)-C(30) | 122.0(5) |
| H(4A)-C(4)-H(4B)  | 109.5     | C(25)-C(24)-C(23) | 119.6(5) |
| N(1)-C(4)-H(4C)   | 109.5     | C(30)-C(24)-C(23) | 118.4(5) |
| H(4A)-C(4)-H(4C)  | 109.5     | C(26)-C(25)-C(24) | 120.8(5) |
| H(4B)-C(4)-H(4C)  | 109.5     | C(26)-C(25)-H(25) | 119.6    |
| C(6)-C(5)-C(10)   | 117.4(5)  | C(24)-C(25)-H(25) | 119.6    |
| C(6)-C(5)-C(3)    | 123.2(5)  | C(25)-C(26)-C(21) | 119.0(5) |
| C(10)-C(5)-C(3)   | 119.5(5)  | C(25)-C(26)-H(26) | 120.5    |
| C(7)-C(6)-C(5)    | 121.9(5)  | C(21)-C(26)-H(26) | 120.5    |
| C(7)-C(6)-O(1)    | 121.3(5)  | C(28)-C(27)-C(23) | 120.9(5) |
| C(5)-C(6)-O(1)    | 116.7(5)  | C(28)-C(27)-H(27) | 119.5    |
| C(8)-C(7)-C(6)    | 119.3(5)  | C(23)-C(27)-H(27) | 119.5    |
| C(8)-C(7)-H(7)    | 120.4     | C(27)-C(28)-C(29) | 120.2(6) |
| C(6)-C(7)-H(7)    | 120.4     | C(27)-C(28)-H(28) | 119.9    |
| C(9)-C(8)-C(7)    | 119.9(6)  | C(29)-C(28)-H(28) | 119.9    |
| C(9)-C(8)-H(8)    | 120.0     | C(30)-C(29)-C(28) | 120.3(6) |
| C(7)-C(8)-H(8)    | 120.0     | C(30)-C(29)-H(29) | 119.8    |
| C(8)-C(9)-C(10)   | 121.2(6)  | C(28)-C(29)-H(29) | 119.8    |
| C(8)-C(9)-H(9)    | 119.4     | C(29)-C(30)-C(24) | 121.6(5) |
| C(10)-C(9)-H(9)   | 119.4     | C(29)-C(30)-H(30) | 119.2    |
| C(9)-C(10)-C(5)   | 120.3(6)  | C(24)-C(30)-H(30) | 119.2    |
| C(9)-C(10)-H(10)  | 119.9     | C(36)-C(31)-C(32) | 116.7(7) |
| C(5)-C(10)-H(10)  | 119.9     | C(36)-C(31)-C(37) | 123.9(6) |
| C(12)-C(11)-C(16) | 123.0(5)  | C(32)-C(31)-C(37) | 119.3(5) |
| C(12)-C(11)-O(2)  | 119.9(4)  | C(36)-C(31)-Ru(1) | 70.4(3)  |

|                     |          |                        |            |
|---------------------|----------|------------------------|------------|
| C(32)-C(31)-Ru(1)   | 71.9(3)  | C(21)-O(3)-P(1)        | 121.0(3)   |
| C(37)-C(31)-Ru(1)   | 130.9(4) | O(1)-P(1)-O(2)         | 99.26(18)  |
| C(33)-C(32)-C(31)   | 121.7(6) | O(1)-P(1)-O(3)         | 99.43(17)  |
| C(33)-C(32)-Ru(1)   | 71.2(4)  | O(2)-P(1)-O(3)         | 103.23(17) |
| C(31)-C(32)-Ru(1)   | 70.4(3)  | O(1)-P(1)-Ru(1)        | 118.48(13) |
| C(33)-C(32)-H(32)   | 119.1    | O(2)-P(1)-Ru(1)        | 111.59(13) |
| C(31)-C(32)-H(32)   | 119.1    | O(3)-P(1)-Ru(1)        | 121.59(12) |
| Ru(1)-C(32)-H(32)   | 132.4    | C(35)-Ru(1)-C(34)      | 38.4(2)    |
| C(32)-C(33)-C(34)   | 122.8(6) | C(35)-Ru(1)-C(36)      | 37.9(3)    |
| C(32)-C(33)-Ru(1)   | 73.8(4)  | C(34)-Ru(1)-C(36)      | 69.0(3)    |
| C(34)-C(33)-Ru(1)   | 69.5(3)  | C(35)-Ru(1)-C(33)      | 66.7(2)    |
| C(32)-C(33)-H(33)   | 118.6    | C(34)-Ru(1)-C(33)      | 37.7(2)    |
| C(34)-C(33)-H(33)   | 118.6    | C(36)-Ru(1)-C(33)      | 78.0(2)    |
| Ru(1)-C(33)-H(33)   | 131.1    | C(35)-Ru(1)-P(1)       | 89.44(15)  |
| C(35)-C(34)-C(33)   | 115.2(7) | C(34)-Ru(1)-P(1)       | 110.77(17) |
| C(35)-C(34)-C(40)   | 122.9(6) | C(36)-Ru(1)-P(1)       | 96.46(16)  |
| C(33)-C(34)-C(40)   | 121.9(6) | C(33)-Ru(1)-P(1)       | 148.08(17) |
| C(35)-C(34)-Ru(1)   | 69.5(3)  | C(35)-Ru(1)-C(31)      | 67.3(3)    |
| C(33)-C(34)-Ru(1)   | 72.8(3)  | C(34)-Ru(1)-C(31)      | 81.5(3)    |
| C(40)-C(34)-Ru(1)   | 127.6(5) | C(36)-Ru(1)-C(31)      | 36.2(2)    |
| C(36)-C(35)-C(34)   | 122.1(6) | C(33)-Ru(1)-C(31)      | 66.5(2)    |
| C(36)-C(35)-Ru(1)   | 73.0(3)  | P(1)-Ru(1)-C(31)       | 124.99(16) |
| C(34)-C(35)-Ru(1)   | 72.1(3)  | C(35)-Ru(1)-C(32)      | 77.8(2)    |
| C(36)-C(35)-H(35)   | 118.9    | C(34)-Ru(1)-C(32)      | 66.5(3)    |
| C(34)-C(35)-H(35)   | 118.9    | C(36)-Ru(1)-C(32)      | 65.5(2)    |
| Ru(1)-C(35)-H(35)   | 128.2    | C(33)-Ru(1)-C(32)      | 35.0(2)    |
| C(31)-C(36)-C(35)   | 121.3(6) | P(1)-Ru(1)-C(32)       | 161.75(16) |
| C(31)-C(36)-Ru(1)   | 73.5(3)  | C(31)-Ru(1)-C(32)      | 37.7(2)    |
| C(35)-C(36)-Ru(1)   | 69.1(3)  | C(35)-Ru(1)-Cl(1)      | 121.1(2)   |
| C(31)-C(36)-H(36)   | 119.4    | C(34)-Ru(1)-Cl(1)      | 90.4(2)    |
| C(35)-C(36)-H(36)   | 119.4    | C(36)-Ru(1)-Cl(1)      | 158.6(2)   |
| Ru(1)-C(36)-H(36)   | 130.9    | C(33)-Ru(1)-Cl(1)      | 89.13(17)  |
| C(38)-C(37)-C(31)   | 115.4(6) | P(1)-Ru(1)-Cl(1)       | 85.50(5)   |
| C(38)-C(37)-C(39)   | 111.4(6) | C(31)-Ru(1)-Cl(1)      | 149.41(16) |
| C(31)-C(37)-C(39)   | 109.1(7) | C(32)-Ru(1)-Cl(1)      | 112.22(17) |
| C(38)-C(37)-H(37)   | 106.8    | C(35)-Ru(1)-Cl(2)      | 149.4(2)   |
| C(31)-C(37)-H(37)   | 106.8    | C(34)-Ru(1)-Cl(2)      | 161.02(17) |
| C(39)-C(37)-H(37)   | 106.8    | C(36)-Ru(1)-Cl(2)      | 112.3(2)   |
| C(37)-C(38)-H(38A)  | 109.5    | C(33)-Ru(1)-Cl(2)      | 123.30(16) |
| C(37)-C(38)-H(38B)  | 109.5    | P(1)-Ru(1)-Cl(2)       | 88.09(5)   |
| H(38A)-C(38)-H(38B) | 109.5    | C(31)-Ru(1)-Cl(2)      | 89.50(18)  |
| C(37)-C(38)-H(38C)  | 109.5    | C(32)-Ru(1)-Cl(2)      | 96.28(18)  |
| H(38A)-C(38)-H(38C) | 109.5    | Cl(1)-Ru(1)-Cl(2)      | 89.02(5)   |
| H(38B)-C(38)-H(38C) | 109.5    | C(42A)-C(41A)-O(4A)    | 106.2(12)  |
| C(37)-C(39)-H(39A)  | 109.5    | C(42A)-C(41A)-H(41A)   | 110.5      |
| C(37)-C(39)-H(39B)  | 109.5    | O(4A)-C(41A)-H(41A)    | 110.5      |
| H(39A)-C(39)-H(39B) | 109.5    | C(42A)-C(41A)-H(41B)   | 110.5      |
| C(37)-C(39)-H(39C)  | 109.5    | O(4A)-C(41A)-H(41B)    | 110.5      |
| H(39A)-C(39)-H(39C) | 109.5    | H(41A)-C(41A)-H(41B)   | 108.7      |
| H(39B)-C(39)-H(39C) | 109.5    | C(41A)-C(42A)-C(42A)#1 | 108.6(6)   |
| C(34)-C(40)-H(40A)  | 109.5    | C(41A)-C(42A)-H(42A)   | 110.0      |
| C(34)-C(40)-H(40B)  | 109.5    | C(42A)#1-C(42A)-H(42A) | 110.0      |
| H(40A)-C(40)-H(40B) | 109.5    | C(41A)-C(42A)-H(42B)   | 110.0      |
| C(34)-C(40)-H(40C)  | 109.5    | C(42A)#1-C(42A)-H(42B) | 110.0      |
| H(40A)-C(40)-H(40C) | 109.5    | H(42A)-C(42A)-H(42B)   | 108.4      |
| H(40B)-C(40)-H(40C) | 109.5    | C(41A)#1-O(4A)-C(41A)  | 110.3(16)  |
| C(1)-N(1)-N(2)      | 112.1(5) | O(4B)-C(41B)-C(42B)    | 100(2)     |
| C(1)-N(1)-C(4)      | 129.0(6) | O(4B)-C(41B)-H(41C)    | 111.7      |
| N(2)-N(1)-C(4)      | 118.9(5) | C(42B)-C(41B)-H(41C)   | 111.7      |
| C(3)-N(2)-N(1)      | 104.6(5) | O(4B)-C(41B)-H(41D)    | 111.7      |
| C(6)-O(1)-P(1)      | 127.5(3) | C(42B)-C(41B)-H(41D)   | 111.7      |
| C(11)-O(2)-P(1)     | 117.4(3) | H(41C)-C(41B)-H(41D)   | 109.5      |

|                        |           |
|------------------------|-----------|
| C(42B)#1-C(42B)-C(41B) | 105.0(19) |
| C(42B)#1-C(42B)-H(42C) | 110.7     |
| C(41B)-C(42B)-H(42C)   | 110.7     |
| C(42B)#1-C(42B)-H(42D) | 110.7     |
| C(41B)-C(42B)-H(42D)   | 110.7     |
| H(42C)-C(42B)-H(42D)   | 108.8     |
| C(41B)-O(4B)-C(41B)#1  | 122(3)    |
| C(48A)-C(43A)-C(44A)   | 126(2)    |
| C(48A)-C(43A)-C(49A)   | 116.9(15) |
| C(44A)-C(43A)-C(49A)   | 116.8(15) |
| C(45A)-C(44A)-C(43A)   | 113.7(14) |
| C(45A)-C(44A)-H(44A)   | 123.1     |
| C(43A)-C(44A)-H(44A)   | 123.1     |
| C(46A)-C(45A)-C(44A)   | 115.7(14) |
| C(46A)-C(45A)-H(45A)   | 122.2     |
| C(44A)-C(45A)-H(45A)   | 122.2     |
| C(47A)-C(46A)-C(45A)   | 132(2)    |
| C(47A)-C(46A)-H(46A)   | 113.8     |
| C(45A)-C(46A)-H(46A)   | 113.8     |
| C(46A)-C(47A)-C(48A)   | 110(2)    |
| C(46A)-C(47A)-H(47A)   | 124.9     |
| C(48A)-C(47A)-H(47A)   | 124.9     |
| C(47A)-C(48A)-C(43A)   | 121(2)    |
| C(47A)-C(48A)-H(48A)   | 119.6     |
| C(43A)-C(48A)-H(48A)   | 119.6     |
| C(44B)-C(43B)-C(49B)   | 121.9(13) |
| C(44B)-C(43B)-C(48B)   | 120.1(16) |
| C(49B)-C(43B)-C(48B)   | 118.0(13) |
| C(43B)-C(44B)-C(45B)   | 122.1(11) |
| C(43B)-C(44B)-H(44B)   | 118.9     |
| C(45B)-C(44B)-H(44B)   | 118.9     |
| C(46B)-C(45B)-C(44B)   | 121.2(11) |
| C(46B)-C(45B)-H(45B)   | 119.4     |
| C(44B)-C(45B)-H(45B)   | 119.4     |
| C(45B)-C(46B)-C(47B)   | 116.1(16) |
| C(45B)-C(46B)-H(46B)   | 121.9     |
| C(47B)-C(46B)-H(46B)   | 121.9     |
| C(48B)-C(47B)-C(46B)   | 124.1(17) |
| C(48B)-C(47B)-H(47B)   | 118.0     |
| C(46B)-C(47B)-H(47B)   | 118.0     |
| C(43B)-C(48B)-C(47B)   | 116.1(16) |
| C(43B)-C(48B)-H(48B)   | 122.0     |
| C(47B)-C(48B)-H(48B)   | 122.0     |
| C(43B)-C(49B)-H(49D)   | 109.5     |
| C(43B)-C(49B)-H(49E)   | 109.5     |
| H(49D)-C(49B)-H(49E)   | 109.5     |
| C(43B)-C(49B)-H(49F)   | 109.5     |
| H(49D)-C(49B)-H(49F)   | 109.5     |
| H(49E)-C(49B)-H(49F)   | 109.5     |

---

Symmetry transformations used to generate equivalent atoms:  
#1 -y+1,-x+1,-z+1/2

**Table 4. Anisotropic displacement parameters [ $\text{\AA}^2 \times 10^3$ ] for 6.**  
 The anisotropic displacement factor exponent takes the form:  
 $-2\pi^2[(ha^*)^2U_{11} + \dots + 2hka^*b^*U_{12}]$

|        | U11      | U22      | U33      | U23      | U13      | U12      |
|--------|----------|----------|----------|----------|----------|----------|
| C(1)   | 70 (5)   | 63 (5)   | 37 (3)   | 6 (3)    | -1 (3)   | 16 (4)   |
| C(2)   | 60 (4)   | 34 (3)   | 34 (3)   | 4 (2)    | -4 (3)   | -1 (3)   |
| C(3)   | 37 (3)   | 37 (3)   | 35 (3)   | -2 (2)   | 5 (2)    | 0 (3)    |
| C(4)   | 78 (5)   | 74 (5)   | 83 (5)   | -30 (4)  | -38 (4)  | 11 (5)   |
| C(5)   | 46 (4)   | 34 (3)   | 36 (3)   | 4 (2)    | 3 (3)    | 3 (3)    |
| C(6)   | 31 (3)   | 28 (3)   | 31 (3)   | 8 (2)    | 2 (2)    | -5 (2)   |
| C(7)   | 44 (3)   | 38 (3)   | 37 (3)   | 0 (2)    | 1 (3)    | -5 (3)   |
| C(8)   | 42 (4)   | 51 (4)   | 47 (3)   | 5 (3)    | -4 (3)   | 11 (3)   |
| C(9)   | 43 (4)   | 43 (4)   | 70 (4)   | -2 (3)   | 6 (3)    | 10 (3)   |
| C(10)  | 49 (4)   | 48 (4)   | 53 (4)   | -9 (3)   | 7 (3)    | 10 (3)   |
| C(11)  | 23 (3)   | 27 (3)   | 31 (3)   | 6 (2)    | 2 (2)    | 1 (2)    |
| C(12)  | 29 (3)   | 26 (3)   | 31 (3)   | 5 (2)    | -1 (2)   | 2 (2)    |
| C(13)  | 29 (3)   | 30 (3)   | 33 (3)   | 1 (2)    | 3 (2)    | 2 (2)    |
| C(14)  | 30 (3)   | 33 (3)   | 37 (3)   | 4 (2)    | 6 (2)    | 5 (2)    |
| C(15)  | 32 (3)   | 33 (3)   | 23 (2)   | 0 (2)    | 2 (2)    | 10 (2)   |
| C(16)  | 31 (3)   | 27 (3)   | 25 (2)   | -2 (2)   | -1 (2)   | 3 (2)    |
| C(17)  | 41 (4)   | 31 (3)   | 41 (3)   | -1 (2)   | -1 (3)   | -7 (3)   |
| C(18)  | 53 (4)   | 42 (4)   | 56 (4)   | 4 (3)    | 1 (3)    | -11 (3)  |
| C(19)  | 47 (4)   | 50 (4)   | 58 (4)   | 13 (3)   | 9 (3)    | -14 (3)  |
| C(20)  | 47 (4)   | 35 (3)   | 43 (3)   | 10 (3)   | 7 (3)    | -3 (3)   |
| C(21)  | 26 (3)   | 30 (3)   | 27 (3)   | -1 (2)   | -8 (2)   | -8 (2)   |
| C(22)  | 26 (3)   | 35 (3)   | 25 (3)   | -1 (2)   | 2 (2)    | -5 (2)   |
| C(23)  | 35 (3)   | 26 (3)   | 33 (3)   | -1 (2)   | -2 (2)   | -2 (2)   |
| C(24)  | 34 (3)   | 46 (4)   | 31 (3)   | -6 (3)   | -1 (2)   | -6 (3)   |
| C(25)  | 41 (3)   | 52 (4)   | 25 (3)   | 1 (3)    | -3 (2)   | -10 (3)  |
| C(26)  | 36 (3)   | 40 (3)   | 26 (3)   | 5 (2)    | -7 (2)   | -3 (2)   |
| C(27)  | 48 (4)   | 39 (3)   | 41 (3)   | 0 (3)    | 2 (3)    | 4 (3)    |
| C(28)  | 61 (4)   | 35 (3)   | 55 (4)   | -7 (3)   | 0 (3)    | 8 (3)    |
| C(29)  | 65 (4)   | 46 (4)   | 48 (3)   | -15 (3)  | 3 (3)    | 9 (4)    |
| C(30)  | 51 (4)   | 58 (4)   | 35 (3)   | -18 (3)  | -1 (3)   | -3 (3)   |
| C(31)  | 59 (4)   | 39 (3)   | 49 (4)   | -7 (3)   | 10 (3)   | -24 (3)  |
| C(32)  | 67 (5)   | 44 (4)   | 37 (3)   | 1 (3)    | 8 (3)    | -33 (3)  |
| C(33)  | 50 (4)   | 51 (4)   | 35 (3)   | -3 (3)   | -1 (3)   | -29 (3)  |
| C(34)  | 61 (4)   | 70 (5)   | 41 (4)   | 8 (3)    | -16 (3)  | -40 (4)  |
| C(35)  | 73 (5)   | 65 (5)   | 21 (3)   | -3 (3)   | -4 (3)   | -47 (4)  |
| C(36)  | 65 (5)   | 50 (4)   | 40 (3)   | -11 (3)  | 9 (3)    | -28 (4)  |
| C(37)  | 86 (5)   | 34 (4)   | 69 (5)   | -10 (3)  | 18 (4)   | -19 (4)  |
| C(38)  | 86 (6)   | 59 (5)   | 78 (5)   | 12 (4)   | 2 (4)    | -13 (4)  |
| C(39)  | 122 (9)  | 45 (5)   | 224 (12) | -29 (6)  | 64 (9)   | -32 (5)  |
| C(40)  | 55 (5)   | 72 (5)   | 72 (5)   | 15 (4)   | -20 (4)  | -25 (4)  |
| N(1)   | 64 (4)   | 61 (4)   | 37 (3)   | -12 (3)  | -7 (3)   | 14 (3)   |
| N(2)   | 59 (3)   | 46 (3)   | 38 (3)   | -5 (2)   | -5 (3)   | 7 (2)    |
| O(1)   | 35 (2)   | 25 (2)   | 24 (2)   | 1 (1)    | 1 (1)    | 0 (2)    |
| O(2)   | 24 (2)   | 26 (2)   | 29 (2)   | 4 (1)    | 0 (1)    | -1 (2)   |
| O(3)   | 27 (2)   | 30 (2)   | 28 (2)   | 0 (2)    | -6 (2)   | -3 (1)   |
| P(1)   | 29 (1)   | 27 (1)   | 23 (1)   | 3 (1)    | -1 (1)   | -6 (1)   |
| Cl(1)  | 39 (1)   | 45 (1)   | 31 (1)   | 1 (1)    | 0 (1)    | -4 (1)   |
| Cl(2)  | 43 (1)   | 38 (1)   | 37 (1)   | 8 (1)    | 1 (1)    | -4 (1)   |
| Ru(1)  | 43 (1)   | 35 (1)   | 24 (1)   | 1 (1)    | 2 (1)    | -17 (1)  |
| C(41A) | 162 (11) | 176 (11) | 77 (8)   | -26 (8)  | 3 (8)    | -147 (9) |
| C(42A) | 310 (20) | 124 (12) | 118 (14) | 8 (10)   | -61 (14) | 2 (14)   |
| O(4A)  | 155 (8)  | 155 (8)  | 163 (15) | -24 (7)  | -24 (7)  | -21 (11) |
| C(41B) | 130 (20) | 190 (20) | 130 (30) | -25 (18) | -20 (20) | -50 (20) |

|        |          |          |          |          |          |          |
|--------|----------|----------|----------|----------|----------|----------|
| C(42B) | 180 (20) | 140 (20) | 100 (20) | 0 (20)   | -10 (20) | -40 (20) |
| O(4B)  | 133 (17) | 133 (17) | 170 (30) | -16 (17) | -16 (17) | -40 (20) |
| C(43A) | 91 (12)  | 52 (12)  | 178 (15) | -22 (16) | -15 (10) | 1 (13)   |
| C(44A) | 105 (11) | 49 (12)  | 134 (14) | 19 (16)  | 21 (12)  | 4 (12)   |
| C(45A) | 98 (10)  | 42 (9)   | 115 (11) | -22 (10) | 3 (10)   | 16 (10)  |
| C(46A) | 86 (11)  | 70 (15)  | 159 (12) | -11 (14) | 30 (9)   | 32 (12)  |
| C(47A) | 179 (15) | 105 (15) | 125 (12) | -5 (15)  | 43 (13)  | -8 (16)  |
| C(48A) | 172 (15) | 46 (11)  | 110 (13) | -43 (11) | -26 (11) | 17 (13)  |
| C(49A) | 85 (15)  | 200 (40) | 390 (40) | 0 (40)   | -52 (16) | 10 (20)  |
| C(43B) | 109 (9)  | 45 (9)   | 141 (11) | -3 (11)  | -2 (9)   | 4 (10)   |
| C(44B) | 83 (7)   | 67 (11)  | 102 (9)  | -41 (9)  | 37 (7)   | -9 (8)   |
| C(45B) | 100 (9)  | 57 (9)   | 112 (10) | -49 (8)  | 18 (7)   | 1 (7)    |
| C(46B) | 63 (8)   | 44 (7)   | 193 (12) | -16 (9)  | 13 (8)   | 6 (7)    |
| C(47B) | 128 (10) | 53 (11)  | 180 (11) | -15 (11) | 49 (10)  | -11 (10) |
| C(48B) | 163 (11) | 56 (9)   | 113 (11) | 11 (10)  | 26 (8)   | -3 (10)  |
| C(49B) | 129 (12) | 35 (10)  | 310 (20) | -2 (14)  | -87 (15) | 24 (12)  |

---

**Table 5. Hydrogen coordinates [ $\times 10^4$ ] and isotropic displacement parameters [ $\text{\AA}^2 \times 10^3$ ] for 6.**

|        | x    | y     | z    | U(eq) |
|--------|------|-------|------|-------|
| H(1)   | 6427 | 1407  | 4921 | 68    |
| H(2)   | 5471 | 678   | 4462 | 51    |
| H(4A)  | 6473 | 3117  | 5130 | 117   |
| H(4B)  | 6163 | 3743  | 4806 | 117   |
| H(4C)  | 7036 | 3239  | 4762 | 117   |
| H(7)   | 4083 | 966   | 3184 | 48    |
| H(8)   | 2913 | 1861  | 3220 | 56    |
| H(9)   | 2743 | 2736  | 3732 | 62    |
| H(10)  | 3753 | 2790  | 4200 | 60    |
| H(15)  | 5557 | -1524 | 4535 | 35    |
| H(16)  | 6332 | -490  | 4230 | 33    |
| H(17)  | 4628 | -2650 | 3192 | 45    |
| H(18)  | 3726 | -3569 | 3500 | 61    |
| H(19)  | 3672 | -3583 | 4159 | 62    |
| H(20)  | 4492 | -2666 | 4502 | 50    |
| H(25)  | 5792 | -1245 | 2014 | 47    |
| H(26)  | 5348 | -103  | 2372 | 41    |
| H(27)  | 6387 | -2899 | 3281 | 51    |
| H(28)  | 6968 | -3968 | 2918 | 60    |
| H(29)  | 7018 | -3835 | 2264 | 63    |
| H(30)  | 6458 | -2667 | 1976 | 57    |
| H(32)  | 7452 | 3161  | 2785 | 59    |
| H(33)  | 8436 | 2152  | 2909 | 55    |
| H(35)  | 7167 | 1492  | 3859 | 64    |
| H(36)  | 6161 | 2545  | 3735 | 62    |
| H(37)  | 5873 | 3543  | 2865 | 76    |
| H(38A) | 4959 | 2970  | 3331 | 112   |
| H(38B) | 4754 | 3930  | 3220 | 112   |
| H(38C) | 5243 | 3726  | 3601 | 112   |
| H(39A) | 6041 | 4920  | 3068 | 196   |
| H(39B) | 6961 | 4497  | 3065 | 196   |
| H(39C) | 6466 | 4617  | 3452 | 196   |
| H(40A) | 9018 | 1221  | 3603 | 100   |
| H(40B) | 8751 | 773   | 3220 | 100   |
| H(40C) | 8278 | 529   | 3601 | 100   |
| H(41A) | 4523 | 7218  | 2430 | 166   |
| H(41B) | 4168 | 6830  | 2044 | 166   |
| H(42A) | 2944 | 7444  | 2134 | 220   |
| H(42B) | 3322 | 7889  | 2501 | 220   |
| H(41C) | 4382 | 5596  | 1961 | 175   |
| H(41D) | 5145 | 6165  | 2127 | 175   |
| H(42C) | 4226 | 7053  | 2443 | 170   |
| H(42D) | 3541 | 6727  | 2142 | 170   |
| H(44A) | 3497 | 4748  | 3818 | 116   |
| H(45A) | 2013 | 4496  | 3799 | 102   |
| H(46A) | 1352 | 4358  | 4350 | 126   |
| H(47A) | 1944 | 4083  | 4911 | 164   |
| H(48A) | 3378 | 4481  | 4938 | 131   |
| H(49A) | 4573 | 5093  | 4652 | 340   |
| H(49B) | 4652 | 5113  | 4206 | 340   |
| H(49C) | 4777 | 4241  | 4427 | 340   |
| H(44B) | 3646 | 4896  | 3709 | 101   |
| H(45B) | 2287 | 4792  | 3453 | 107   |
| H(46B) | 1153 | 4347  | 3815 | 120   |
| H(47B) | 1428 | 4013  | 4453 | 144   |



|         |      |      |      |     |
|---------|------|------|------|-----|
| H (48B) | 2764 | 4239 | 4733 | 133 |
| H (49D) | 4484 | 4128 | 4345 | 238 |
| H (49E) | 4111 | 4748 | 4658 | 238 |
| H (49F) | 4449 | 5126 | 4271 | 238 |

---

**Table 1. Crystal data and structure refinement for 7.**

|                                                               |                                                                                   |                        |
|---------------------------------------------------------------|-----------------------------------------------------------------------------------|------------------------|
| Empirical formula                                             | C <sub>41</sub> H <sub>36</sub> Cl <sub>3</sub> N <sub>2</sub> O <sub>7</sub> PRu |                        |
| Formula weight                                                | 978.01                                                                            |                        |
| Crystal colour and habit                                      | yellow block                                                                      |                        |
| Crystal size (mm)                                             | 0.10 x 0.12 x 0.14                                                                |                        |
| Temperature (K)                                               | 150(2)                                                                            |                        |
| Wavelength (Å)                                                | 0.71073                                                                           |                        |
| Crystal system                                                | Monoclinic                                                                        |                        |
| Space group                                                   | P2 <sub>1</sub>                                                                   |                        |
| Unit cell dimensions                                          | <i>a</i> = 11.4579(2) Å                                                           | <i>α</i> = 90°         |
|                                                               | <i>b</i> = 15.0138(2) Å                                                           | <i>β</i> = 100.677(2)° |
|                                                               | <i>c</i> = 12.2822(2) Å                                                           | <i>γ</i> = 90°         |
| Volume (Å <sup>3</sup> )                                      | 2076.29(6)                                                                        |                        |
| <i>Z</i>                                                      | 2                                                                                 |                        |
| Calculated density (Mg/m <sup>3</sup> )                       | 1.564                                                                             |                        |
| Absorption coefficient (mm <sup>-1</sup> )                    | 0.790                                                                             |                        |
| <i>F</i> (000)                                                | 992                                                                               |                        |
| <i>θ</i> -range for data collection (°)                       | 3.02/32.51                                                                        |                        |
| Index ranges                                                  | -16 ≤ <i>h</i> ≤ 16, -21 ≤ <i>k</i> ≤ 22, -18 ≤ <i>l</i> ≤ 17                     |                        |
| Reflections collected                                         | 30506                                                                             |                        |
| Independent reflections                                       | 12948 ( <i>R</i> <sub>int</sub> = 0.0488)                                         |                        |
| Completeness to <i>θ</i> = 32.51°                             | 92.0 %                                                                            |                        |
| Absorption correction                                         | Semi-empirical from equivalents (Multiscan)                                       |                        |
| Max. and min. transmission                                    | 1.00000 and 0.93125                                                               |                        |
| Refinement method                                             | Full-matrix least-squares on <i>F</i> <sup>2</sup>                                |                        |
| Data/restraints/parameters                                    | 12948/1/518                                                                       |                        |
| Goodness-of-fit on <i>F</i> <sup>2</sup>                      | 0.923                                                                             |                        |
| Final <i>R</i> indices [ <i>I</i> > 2σ( <i>I</i> )]           | <i>R</i> <sub>1</sub> = 0.0459, <i>wR</i> <sub>2</sub> = 0.0979                   |                        |
| <i>R</i> indices (all data)                                   | <i>R</i> <sub>1</sub> = 0.0698, <i>wR</i> <sub>2</sub> = 0.1046                   |                        |
| Absolute structure parameter                                  | -0.04(2)                                                                          |                        |
| Largest diff. Peak and hole (e <sup>-</sup> Å <sup>-3</sup> ) | 1.026/-0.932                                                                      |                        |

**Definitions:**

$$R_1 = \frac{\sum \|F_o\| - \|F_c\|}{\sum \|F_o\|}$$

$$wR_2 = \sqrt{\frac{\sum [w(F_o^2 - F_c^2)^2]}{\sum [w(F_o^2)^2]}}$$

$$GooF = \sqrt{\frac{\sum [w(F_o^2 - F_c^2)]}{(n - p)}}$$

n = number of reflections; p = number of parameters

**Notes on the refinement of 7.**

All hydrogen atom positions were calculated in deal positions (riding model). The target molecule was co-crystallized with one CHCl<sub>3</sub>.

**Table 2. Atomic coordinates [ $\times 10^4$ ] and equivalent isotropic displacement parameters [ $\text{\AA}^2 \times 10^3$ ] for 7.**

U(eq) is defined as one third of the trace of the orthogonalized  $U_{ij}$  tensor.

|       | x        | y        | z       | U(eq)  |
|-------|----------|----------|---------|--------|
| C(1)  | 5431(4)  | 5385(3)  | 3800(3) | 35(1)  |
| C(2)  | 4289(4)  | 5103(3)  | 3451(3) | 35(1)  |
| C(3)  | 3642(3)  | 5861(3)  | 3071(3) | 30(1)  |
| C(4)  | 6553(4)  | 6786(3)  | 3765(4) | 41(1)  |
| C(5)  | 2417(4)  | 5892(3)  | 2440(4) | 32(1)  |
| C(6)  | 1504(3)  | 6411(3)  | 2733(3) | 31(1)  |
| C(7)  | 411(4)   | 6466(3)  | 2052(4) | 40(1)  |
| C(8)  | 188(4)   | 5983(3)  | 1060(4) | 47(1)  |
| C(9)  | 1069(4)  | 5435(3)  | 791(4)  | 48(1)  |
| C(10) | 2171(4)  | 5398(3)  | 1475(4) | 36(1)  |
| C(11) | 966(3)   | 8407(2)  | 4959(3) | 25(1)  |
| C(12) | 1297(3)  | 8331(2)  | 6084(3) | 24(1)  |
| C(13) | 350(3)   | 8220(2)  | 6712(3) | 27(1)  |
| C(14) | -845(3)  | 8254(3)  | 6144(4) | 32(1)  |
| C(15) | -1098(3) | 8376(3)  | 4977(4) | 34(1)  |
| C(16) | -213(3)  | 8438(3)  | 4386(3) | 33(1)  |
| C(17) | 573(3)   | 8026(3)  | 7859(3) | 33(1)  |
| C(18) | -338(3)  | 7921(4)  | 8425(3) | 41(1)  |
| C(19) | -1528(3) | 8005(4)  | 7856(4) | 41(1)  |
| C(20) | -1776(3) | 8155(3)  | 6751(4) | 36(1)  |
| C(21) | 3360(3)  | 7774(2)  | 6263(3) | 28(1)  |
| C(22) | 2568(3)  | 8327(2)  | 6621(3) | 24(1)  |
| C(23) | 3005(3)  | 8900(3)  | 7546(3) | 28(1)  |
| C(24) | 4168(3)  | 8771(3)  | 8164(3) | 33(1)  |
| C(25) | 4896(3)  | 8109(3)  | 7808(3) | 37(1)  |
| C(26) | 4530(3)  | 7643(3)  | 6873(4) | 34(1)  |
| C(27) | 2340(4)  | 9637(3)  | 7836(4) | 35(1)  |
| C(28) | 2788(4)  | 10180(3) | 8723(4) | 39(1)  |
| C(29) | 3925(4)  | 10004(3) | 9347(4) | 45(1)  |
| C(30) | 4587(4)  | 9339(3)  | 9076(4) | 41(1)  |
| C(31) | 2962(3)  | 9175(2)  | 2109(3) | 29(1)  |
| C(32) | 2359(3)  | 8385(3)  | 1623(3) | 30(1)  |
| C(33) | 2955(3)  | 7726(2)  | 1171(3) | 30(1)  |
| C(34) | 4204(3)  | 7790(3)  | 1161(3) | 33(1)  |
| C(35) | 4812(4)  | 8542(3)  | 1663(3) | 35(1)  |
| C(36) | 4186(3)  | 9208(3)  | 2129(3) | 33(1)  |
| C(37) | 2283(5)  | 9931(3)  | 2506(4) | 43(1)  |
| C(38) | 3017(7)  | 10547(4) | 3316(6) | 97(3)  |
| C(39) | 1651(5)  | 10441(3) | 1502(4) | 49(1)  |
| C(40) | 4829(5)  | 7048(3)  | 682(4)  | 48(1)  |
| C(41) | 2037(10) | 5392(6)  | 7229(9) | 121(3) |
| N(1)  | 5468(3)  | 6262(2)  | 3672(3) | 29(1)  |
| N(2)  | 4374(3)  | 6585(2)  | 3217(2) | 25(1)  |
| O(1)  | 1660(2)  | 6872(2)  | 3729(2) | 33(1)  |
| O(2)  | 1855(2)  | 8487(2)  | 4306(2) | 26(1)  |
| O(3)  | 3057(2)  | 7252(2)  | 5329(2) | 27(1)  |
| O(4)  | 7775(3)  | 8051(3)  | 2079(3) | 61(1)  |
| O(5)  | 9311(3)  | 8512(2)  | 1205(3) | 55(1)  |
| O(6)  | 7984(4)  | 7411(3)  | 405(4)  | 67(1)  |
| O(7)  | 7348(3)  | 8871(3)  | 442(3)  | 62(1)  |
| P(1)  | 2605(1)  | 7634(1)  | 4105(1) | 24(1)  |
| Cl(1) | 5120(1)  | 8451(1)  | 4540(1) | 33(1)  |
| Cl(2) | 8104(1)  | 8210(1)  | 1038(1) | 37(1)  |
| Cl(3) | 3034(2)  | 5124(2)  | 6352(3) | 143(1) |
| Cl(4) | 2839(5)  | 6024(3)  | 8317(4) | 192(2) |

|       |         |         |         |        |
|-------|---------|---------|---------|--------|
| Cl(5) | 786(3)  | 5862(2) | 6509(4) | 168(1) |
| Ru(1) | 3835(1) | 7930(1) | 2911(1) | 23(1)  |

---

**Table 3. Bond lengths [Å] and angles [°] for 7.**

|             |          |                  |            |
|-------------|----------|------------------|------------|
| C(1)-N(1)   | 1.328(5) | C(31)-C(36)      | 1.400(6)   |
| C(1)-C(2)   | 1.366(6) | C(31)-C(32)      | 1.443(6)   |
| C(1)-H(1)   | 0.9500   | C(31)-C(37)      | 1.507(6)   |
| C(2)-C(3)   | 1.390(5) | C(31)-Ru(1)      | 2.258(4)   |
| C(2)-H(2)   | 0.9500   | C(32)-C(33)      | 1.377(5)   |
| C(3)-N(2)   | 1.364(5) | C(32)-Ru(1)      | 2.200(4)   |
| C(3)-C(5)   | 1.473(6) | C(32)-H(32)      | 0.9500     |
| C(4)-N(1)   | 1.457(5) | C(33)-C(34)      | 1.437(5)   |
| C(4)-H(4A)  | 0.9800   | C(33)-Ru(1)      | 2.209(4)   |
| C(4)-H(4B)  | 0.9800   | C(33)-H(33)      | 0.9500     |
| C(4)-H(4C)  | 0.9800   | C(34)-C(35)      | 1.408(6)   |
| C(5)-C(10)  | 1.382(6) | C(34)-C(40)      | 1.502(6)   |
| C(5)-C(6)   | 1.403(6) | C(34)-Ru(1)      | 2.276(3)   |
| C(6)-C(7)   | 1.374(6) | C(35)-C(36)      | 1.413(6)   |
| C(6)-O(1)   | 1.388(5) | C(35)-Ru(1)      | 2.255(4)   |
| C(7)-C(8)   | 1.400(7) | C(35)-H(35)      | 0.9500     |
| C(7)-H(7)   | 0.9500   | C(36)-Ru(1)      | 2.216(4)   |
| C(8)-C(9)   | 1.389(6) | C(36)-H(36)      | 0.9500     |
| C(8)-H(8)   | 0.9500   | C(37)-C(38)      | 1.498(8)   |
| C(9)-C(10)  | 1.382(7) | C(37)-C(39)      | 1.518(7)   |
| C(9)-H(9)   | 0.9500   | C(37)-H(37)      | 1.0000     |
| C(10)-H(10) | 0.9500   | C(38)-H(38A)     | 0.9800     |
| C(11)-C(12) | 1.368(5) | C(38)-H(38B)     | 0.9800     |
| C(11)-C(16) | 1.404(5) | C(38)-H(38C)     | 0.9800     |
| C(11)-O(2)  | 1.414(4) | C(39)-H(39A)     | 0.9800     |
| C(12)-C(13) | 1.452(5) | C(39)-H(39B)     | 0.9800     |
| C(12)-C(22) | 1.484(5) | C(39)-H(39C)     | 0.9800     |
| C(13)-C(17) | 1.415(6) | C(40)-H(40A)     | 0.9800     |
| C(13)-C(14) | 1.419(5) | C(40)-H(40B)     | 0.9800     |
| C(14)-C(20) | 1.418(5) | C(40)-H(40C)     | 0.9800     |
| C(14)-C(15) | 1.420(6) | C(41)-Cl(5)      | 1.692(11)  |
| C(15)-C(16) | 1.355(6) | C(41)-Cl(4)      | 1.754(11)  |
| C(15)-H(15) | 0.9500   | C(41)-Cl(3)      | 1.755(11)  |
| C(16)-H(16) | 0.9500   | C(41)-H(41)      | 1.0000     |
| C(17)-C(18) | 1.365(5) | N(1)-N(2)        | 1.363(4)   |
| C(17)-H(17) | 0.9500   | N(2)-Ru(1)       | 2.125(3)   |
| C(18)-C(19) | 1.418(6) | O(1)-P(1)        | 1.584(3)   |
| C(18)-H(18) | 0.9500   | O(2)-P(1)        | 1.587(3)   |
| C(19)-C(20) | 1.353(6) | O(3)-P(1)        | 1.603(3)   |
| C(19)-H(19) | 0.9500   | O(4)-Cl(2)       | 1.420(3)   |
| C(20)-H(20) | 0.9500   | O(5)-Cl(2)       | 1.434(3)   |
| C(21)-C(22) | 1.361(5) | O(6)-Cl(2)       | 1.422(4)   |
| C(21)-O(3)  | 1.380(5) | O(7)-Cl(2)       | 1.426(3)   |
| C(21)-C(26) | 1.423(5) | P(1)-Ru(1)       | 2.2577(10) |
| C(22)-C(23) | 1.439(5) | Cl(1)-Ru(1)      | 2.3853(9)  |
| C(23)-C(24) | 1.419(5) |                  |            |
| C(23)-C(27) | 1.426(5) | N(1)-C(1)-C(2)   | 108.6(3)   |
| C(24)-C(25) | 1.417(6) | N(1)-C(1)-H(1)   | 125.7      |
| C(24)-C(30) | 1.418(6) | C(2)-C(1)-H(1)   | 125.7      |
| C(25)-C(26) | 1.344(6) | C(1)-C(2)-C(3)   | 105.8(3)   |
| C(25)-H(25) | 0.9500   | C(1)-C(2)-H(2)   | 127.1      |
| C(26)-H(26) | 0.9500   | C(3)-C(2)-H(2)   | 127.1      |
| C(27)-C(28) | 1.381(6) | N(2)-C(3)-C(2)   | 109.3(4)   |
| C(27)-H(27) | 0.9500   | N(2)-C(3)-C(5)   | 123.2(3)   |
| C(28)-C(29) | 1.409(7) | C(2)-C(3)-C(5)   | 126.8(4)   |
| C(28)-H(28) | 0.9500   | N(1)-C(4)-H(4A)  | 109.5      |
| C(29)-C(30) | 1.333(7) | N(1)-C(4)-H(4B)  | 109.5      |
| C(29)-H(29) | 0.9500   | H(4A)-C(4)-H(4B) | 109.5      |
| C(30)-H(30) | 0.9500   | N(1)-C(4)-H(4C)  | 109.5      |

|                   |          |                    |          |
|-------------------|----------|--------------------|----------|
| H(4A)-C(4)-H(4C)  | 109.5    | C(26)-C(25)-C(24)  | 121.4(3) |
| H(4B)-C(4)-H(4C)  | 109.5    | C(26)-C(25)-H(25)  | 119.3    |
| C(10)-C(5)-C(6)   | 118.4(4) | C(24)-C(25)-H(25)  | 119.3    |
| C(10)-C(5)-C(3)   | 117.2(4) | C(25)-C(26)-C(21)  | 119.5(4) |
| C(6)-C(5)-C(3)    | 124.4(4) | C(25)-C(26)-H(26)  | 120.3    |
| C(7)-C(6)-O(1)    | 117.4(3) | C(21)-C(26)-H(26)  | 120.3    |
| C(7)-C(6)-C(5)    | 121.0(4) | C(28)-C(27)-C(23)  | 121.2(4) |
| O(1)-C(6)-C(5)    | 121.5(4) | C(28)-C(27)-H(27)  | 119.4    |
| C(6)-C(7)-C(8)    | 119.9(4) | C(23)-C(27)-H(27)  | 119.4    |
| C(6)-C(7)-H(7)    | 120.1    | C(27)-C(28)-C(29)  | 119.3(4) |
| C(8)-C(7)-H(7)    | 120.1    | C(27)-C(28)-H(28)  | 120.3    |
| C(9)-C(8)-C(7)    | 119.3(4) | C(29)-C(28)-H(28)  | 120.3    |
| C(9)-C(8)-H(8)    | 120.3    | C(30)-C(29)-C(28)  | 121.1(4) |
| C(7)-C(8)-H(8)    | 120.3    | C(30)-C(29)-H(29)  | 119.5    |
| C(10)-C(9)-C(8)   | 120.2(4) | C(28)-C(29)-H(29)  | 119.5    |
| C(10)-C(9)-H(9)   | 119.9    | C(29)-C(30)-C(24)  | 121.5(4) |
| C(8)-C(9)-H(9)    | 119.9    | C(29)-C(30)-H(30)  | 119.3    |
| C(9)-C(10)-C(5)   | 121.2(4) | C(24)-C(30)-H(30)  | 119.3    |
| C(9)-C(10)-H(10)  | 119.4    | C(36)-C(31)-C(32)  | 116.0(3) |
| C(5)-C(10)-H(10)  | 119.4    | C(36)-C(31)-C(37)  | 122.9(4) |
| C(12)-C(11)-C(16) | 124.8(3) | C(32)-C(31)-C(37)  | 121.1(4) |
| C(12)-C(11)-O(2)  | 119.1(3) | C(36)-C(31)-Ru(1)  | 70.2(2)  |
| C(16)-C(11)-O(2)  | 116.1(3) | C(32)-C(31)-Ru(1)  | 68.9(2)  |
| C(11)-C(12)-C(13) | 116.8(3) | C(37)-C(31)-Ru(1)  | 134.1(3) |
| C(11)-C(12)-C(22) | 121.0(3) | C(33)-C(32)-C(31)  | 121.5(3) |
| C(13)-C(12)-C(22) | 122.1(3) | C(33)-C(32)-Ru(1)  | 72.2(2)  |
| C(17)-C(13)-C(14) | 118.5(3) | C(31)-C(32)-Ru(1)  | 73.3(2)  |
| C(17)-C(13)-C(12) | 122.6(3) | C(33)-C(32)-H(32)  | 119.3    |
| C(14)-C(13)-C(12) | 118.9(4) | C(31)-C(32)-H(32)  | 119.3    |
| C(20)-C(14)-C(13) | 119.3(4) | Ru(1)-C(32)-H(32)  | 127.4    |
| C(20)-C(14)-C(15) | 120.8(4) | C(32)-C(33)-C(34)  | 121.6(3) |
| C(13)-C(14)-C(15) | 119.9(4) | C(32)-C(33)-Ru(1)  | 71.4(2)  |
| C(16)-C(15)-C(14) | 121.1(4) | C(34)-C(33)-Ru(1)  | 73.9(2)  |
| C(16)-C(15)-H(15) | 119.5    | C(32)-C(33)-H(33)  | 119.2    |
| C(14)-C(15)-H(15) | 119.5    | C(34)-C(33)-H(33)  | 119.2    |
| C(15)-C(16)-C(11) | 118.4(4) | Ru(1)-C(33)-H(33)  | 127.7    |
| C(15)-C(16)-H(16) | 120.8    | C(35)-C(34)-C(33)  | 117.6(3) |
| C(11)-C(16)-H(16) | 120.8    | C(35)-C(34)-C(40)  | 122.2(4) |
| C(18)-C(17)-C(13) | 121.1(4) | C(33)-C(34)-C(40)  | 120.1(4) |
| C(18)-C(17)-H(17) | 119.4    | C(35)-C(34)-Ru(1)  | 71.1(2)  |
| C(13)-C(17)-H(17) | 119.4    | C(33)-C(34)-Ru(1)  | 68.8(2)  |
| C(17)-C(18)-C(19) | 119.7(4) | C(40)-C(34)-Ru(1)  | 128.6(3) |
| C(17)-C(18)-H(18) | 120.2    | C(34)-C(35)-C(36)  | 119.9(4) |
| C(19)-C(18)-H(18) | 120.2    | C(34)-C(35)-Ru(1)  | 72.7(2)  |
| C(20)-C(19)-C(18) | 120.8(3) | C(36)-C(35)-Ru(1)  | 70.1(2)  |
| C(20)-C(19)-H(19) | 119.6    | C(34)-C(35)-H(35)  | 120.1    |
| C(18)-C(19)-H(19) | 119.6    | C(36)-C(35)-H(35)  | 120.1    |
| C(19)-C(20)-C(14) | 120.5(4) | Ru(1)-C(35)-H(35)  | 129.5    |
| C(19)-C(20)-H(20) | 119.8    | C(31)-C(36)-C(35)  | 123.4(4) |
| C(14)-C(20)-H(20) | 119.8    | C(31)-C(36)-Ru(1)  | 73.4(2)  |
| C(22)-C(21)-O(3)  | 122.3(3) | C(35)-C(36)-Ru(1)  | 73.1(2)  |
| C(22)-C(21)-C(26) | 122.3(4) | C(31)-C(36)-H(36)  | 118.3    |
| O(3)-C(21)-C(26)  | 115.3(3) | C(35)-C(36)-H(36)  | 118.3    |
| C(21)-C(22)-C(23) | 117.7(3) | Ru(1)-C(36)-H(36)  | 127.4    |
| C(21)-C(22)-C(12) | 121.2(3) | C(38)-C(37)-C(31)  | 114.9(5) |
| C(23)-C(22)-C(12) | 121.2(3) | C(38)-C(37)-C(39)  | 110.6(4) |
| C(24)-C(23)-C(27) | 117.7(4) | C(31)-C(37)-C(39)  | 108.3(4) |
| C(24)-C(23)-C(22) | 119.7(3) | C(38)-C(37)-H(37)  | 107.6    |
| C(27)-C(23)-C(22) | 122.5(3) | C(31)-C(37)-H(37)  | 107.6    |
| C(25)-C(24)-C(30) | 122.2(4) | C(39)-C(37)-H(37)  | 107.6    |
| C(25)-C(24)-C(23) | 118.6(4) | C(37)-C(38)-H(38A) | 109.5    |
| C(30)-C(24)-C(23) | 119.2(4) | C(37)-C(38)-H(38B) | 109.5    |

|                     |            |                   |            |
|---------------------|------------|-------------------|------------|
| H(38A)-C(38)-H(38B) | 109.5      | C(35)-Ru(1)-C(31) | 66.53(14)  |
| C(37)-C(38)-H(38C)  | 109.5      | P(1)-Ru(1)-C(31)  | 99.59(10)  |
| H(38A)-C(38)-H(38C) | 109.5      | N(2)-Ru(1)-C(34)  | 88.87(13)  |
| H(38B)-C(38)-H(38C) | 109.5      | C(32)-Ru(1)-C(34) | 66.54(14)  |
| C(37)-C(39)-H(39A)  | 109.5      | C(33)-Ru(1)-C(34) | 37.32(14)  |
| C(37)-C(39)-H(39B)  | 109.5      | C(36)-Ru(1)-C(34) | 65.80(15)  |
| H(39A)-C(39)-H(39B) | 109.5      | C(35)-Ru(1)-C(34) | 36.19(15)  |
| C(37)-C(39)-H(39C)  | 109.5      | P(1)-Ru(1)-C(34)  | 147.38(11) |
| H(39A)-C(39)-H(39C) | 109.5      | C(31)-Ru(1)-C(34) | 79.00(14)  |
| H(39B)-C(39)-H(39C) | 109.5      | N(2)-Ru(1)-Cl(1)  | 92.85(9)   |
| C(34)-C(40)-H(40A)  | 109.5      | C(32)-Ru(1)-Cl(1) | 140.70(11) |
| C(34)-C(40)-H(40B)  | 109.5      | C(33)-Ru(1)-Cl(1) | 163.15(10) |
| H(40A)-C(40)-H(40B) | 109.5      | C(36)-Ru(1)-Cl(1) | 86.91(11)  |
| C(34)-C(40)-H(40C)  | 109.5      | C(35)-Ru(1)-Cl(1) | 97.45(11)  |
| H(40A)-C(40)-H(40C) | 109.5      | P(1)-Ru(1)-Cl(1)  | 83.26(3)   |
| H(40B)-C(40)-H(40C) | 109.5      | C(31)-Ru(1)-Cl(1) | 104.43(10) |
| Cl(5)-C(41)-Cl(4)   | 116.5(6)   | C(34)-Ru(1)-Cl(1) | 128.96(10) |
| Cl(5)-C(41)-Cl(3)   | 111.1(6)   |                   |            |
| Cl(4)-C(41)-Cl(3)   | 106.4(6)   |                   |            |
| Cl(5)-C(41)-H(41)   | 107.5      |                   |            |
| Cl(4)-C(41)-H(41)   | 107.5      |                   |            |
| Cl(3)-C(41)-H(41)   | 107.5      |                   |            |
| C(1)-N(1)-N(2)      | 110.7(3)   |                   |            |
| C(1)-N(1)-C(4)      | 124.9(3)   |                   |            |
| N(2)-N(1)-C(4)      | 123.1(3)   |                   |            |
| N(1)-N(2)-C(3)      | 105.5(3)   |                   |            |
| N(1)-N(2)-Ru(1)     | 128.7(2)   |                   |            |
| C(3)-N(2)-Ru(1)     | 125.6(2)   |                   |            |
| C(6)-O(1)-P(1)      | 125.9(2)   |                   |            |
| C(11)-O(2)-P(1)     | 119.1(2)   |                   |            |
| C(21)-O(3)-P(1)     | 124.4(2)   |                   |            |
| O(1)-P(1)-O(2)      | 105.49(14) |                   |            |
| O(1)-P(1)-O(3)      | 95.69(14)  |                   |            |
| O(2)-P(1)-O(3)      | 103.48(14) |                   |            |
| O(1)-P(1)-Ru(1)     | 115.37(11) |                   |            |
| O(2)-P(1)-Ru(1)     | 111.31(10) |                   |            |
| O(3)-P(1)-Ru(1)     | 123.19(10) |                   |            |
| O(4)-Cl(2)-O(6)     | 109.6(3)   |                   |            |
| O(4)-Cl(2)-O(7)     | 110.0(2)   |                   |            |
| O(6)-Cl(2)-O(7)     | 108.5(3)   |                   |            |
| O(4)-Cl(2)-O(5)     | 109.5(2)   |                   |            |
| O(6)-Cl(2)-O(5)     | 109.7(2)   |                   |            |
| O(7)-Cl(2)-O(5)     | 109.4(2)   |                   |            |
| N(2)-Ru(1)-C(32)    | 125.60(13) |                   |            |
| N(2)-Ru(1)-C(33)    | 96.01(12)  |                   |            |
| C(32)-Ru(1)-C(33)   | 36.39(14)  |                   |            |
| N(2)-Ru(1)-C(36)    | 146.05(13) |                   |            |
| C(32)-Ru(1)-C(36)   | 66.17(14)  |                   |            |
| C(33)-Ru(1)-C(36)   | 77.74(14)  |                   |            |
| N(2)-Ru(1)-C(35)    | 110.04(13) |                   |            |
| C(32)-Ru(1)-C(35)   | 78.26(14)  |                   |            |
| C(33)-Ru(1)-C(35)   | 66.03(15)  |                   |            |
| C(36)-Ru(1)-C(35)   | 36.82(15)  |                   |            |
| N(2)-Ru(1)-P(1)     | 83.93(8)   |                   |            |
| C(32)-Ru(1)-P(1)    | 92.22(10)  |                   |            |
| C(33)-Ru(1)-P(1)    | 111.88(11) |                   |            |
| C(36)-Ru(1)-P(1)    | 129.58(11) |                   |            |
| C(35)-Ru(1)-P(1)    | 165.90(11) |                   |            |
| N(2)-Ru(1)-C(31)    | 162.64(12) |                   |            |
| C(32)-Ru(1)-C(31)   | 37.76(14)  |                   |            |
| C(33)-Ru(1)-C(31)   | 66.84(13)  |                   |            |
| C(36)-Ru(1)-C(31)   | 36.44(14)  |                   |            |

**Table 4. Anisotropic displacement parameters [ $\text{\AA}^2 \times 10^3$ ] for 7.**

The anisotropic displacement factor exponent takes the form:

$$-2\pi^2[(h a^*)^2 U_{11} + \dots + 2h k a^* b^* U_{12}]$$

|       | U <sup>11</sup> | U <sup>22</sup> | U <sup>33</sup> | U <sup>23</sup> | U <sup>13</sup> | U <sup>12</sup> |
|-------|-----------------|-----------------|-----------------|-----------------|-----------------|-----------------|
| C(1)  | 41(2)           | 35(2)           | 27(2)           | 2(2)            | 4(2)            | 14(2)           |
| C(2)  | 46(2)           | 25(2)           | 34(2)           | 3(2)            | 6(2)            | 3(2)            |
| C(3)  | 37(2)           | 28(2)           | 26(2)           | -1(1)           | 10(2)           | 3(2)            |
| C(4)  | 27(2)           | 44(2)           | 50(3)           | 2(2)            | 3(2)            | 3(2)            |
| C(5)  | 31(2)           | 30(2)           | 35(2)           | -1(2)           | 6(2)            | -7(2)           |
| C(6)  | 34(2)           | 29(2)           | 32(2)           | -6(2)           | 12(2)           | -4(2)           |
| C(7)  | 29(2)           | 38(2)           | 53(3)           | -12(2)          | 8(2)            | 2(2)            |
| C(8)  | 28(2)           | 60(3)           | 51(3)           | -18(2)          | 1(2)            | -8(2)           |
| C(9)  | 43(3)           | 50(3)           | 52(3)           | -27(2)          | 12(2)           | -8(2)           |
| C(10) | 31(2)           | 33(2)           | 46(3)           | -14(2)          | 8(2)            | -4(2)           |
| C(11) | 23(2)           | 24(2)           | 28(2)           | -2(1)           | 5(1)            | 0(1)            |
| C(12) | 23(2)           | 21(2)           | 28(2)           | 0(1)            | 7(2)            | -1(1)           |
| C(13) | 20(2)           | 27(2)           | 35(2)           | -2(1)           | 4(2)            | 1(1)            |
| C(14) | 24(2)           | 30(2)           | 42(2)           | -8(2)           | 6(2)            | 1(1)            |
| C(15) | 24(2)           | 33(2)           | 43(2)           | -5(2)           | -2(2)           | 2(2)            |
| C(16) | 32(2)           | 35(2)           | 29(2)           | 1(2)            | -4(2)           | 2(2)            |
| C(17) | 26(2)           | 39(2)           | 34(2)           | -1(2)           | 7(1)            | -5(2)           |
| C(18) | 39(2)           | 43(2)           | 44(2)           | -2(3)           | 15(2)           | -2(3)           |
| C(19) | 30(2)           | 44(3)           | 57(2)           | -9(3)           | 22(2)           | -7(2)           |
| C(20) | 23(2)           | 42(3)           | 47(2)           | -4(2)           | 13(2)           | -3(1)           |
| C(21) | 28(2)           | 31(3)           | 25(2)           | 11(1)           | 7(1)            | 4(1)            |
| C(22) | 19(2)           | 30(2)           | 24(2)           | 4(1)            | 6(1)            | 1(1)            |
| C(23) | 26(2)           | 39(2)           | 19(2)           | 7(1)            | 8(1)            | -7(1)           |
| C(24) | 25(2)           | 51(2)           | 22(2)           | 11(2)           | 6(2)            | -3(2)           |
| C(25) | 21(2)           | 61(3)           | 26(2)           | 16(2)           | 1(1)            | 3(2)            |
| C(26) | 25(2)           | 44(2)           | 36(2)           | 14(2)           | 11(2)           | 10(2)           |
| C(27) | 35(2)           | 34(2)           | 40(2)           | 1(2)            | 19(2)           | -2(2)           |
| C(28) | 43(2)           | 44(3)           | 34(2)           | -3(2)           | 14(2)           | -9(2)           |
| C(29) | 54(3)           | 58(3)           | 25(2)           | -8(2)           | 10(2)           | -29(2)          |
| C(30) | 34(2)           | 60(3)           | 26(2)           | 7(2)            | 1(2)            | -16(2)          |
| C(31) | 37(2)           | 25(2)           | 24(2)           | 6(1)            | 5(2)            | 1(2)            |
| C(32) | 28(2)           | 37(2)           | 25(2)           | 8(2)            | 3(2)            | 3(2)            |
| C(33) | 39(2)           | 23(2)           | 25(2)           | 1(1)            | 1(2)            | -3(1)           |
| C(34) | 41(2)           | 39(3)           | 21(2)           | 4(2)            | 11(2)           | 7(2)            |
| C(35) | 34(2)           | 38(2)           | 35(2)           | 8(2)            | 12(2)           | -1(2)           |
| C(36) | 37(2)           | 28(2)           | 32(2)           | 8(2)            | 2(2)            | -5(2)           |
| C(37) | 69(4)           | 31(3)           | 32(3)           | 9(2)            | 14(2)           | 15(2)           |
| C(38) | 139(7)          | 64(4)           | 66(4)           | -32(3)          | -37(4)          | 48(4)           |
| C(39) | 68(3)           | 35(2)           | 42(3)           | 7(2)            | 4(3)            | 25(2)           |
| C(40) | 62(3)           | 47(3)           | 39(3)           | 5(2)            | 20(2)           | 11(2)           |
| C(41) | 154(9)          | 74(5)           | 141(9)          | 0(5)            | 40(7)           | -2(5)           |
| N(1)  | 28(2)           | 35(2)           | 25(2)           | 2(1)            | 6(1)            | 5(1)            |
| N(2)  | 24(2)           | 32(2)           | 20(1)           | 1(1)            | 6(1)            | 2(1)            |
| O(1)  | 33(1)           | 34(1)           | 36(2)           | -9(1)           | 14(1)           | -9(1)           |
| O(2)  | 29(1)           | 29(1)           | 21(1)           | 0(1)            | 5(1)            | 7(1)            |
| O(3)  | 33(1)           | 25(1)           | 26(1)           | 4(1)            | 9(1)            | 5(1)            |
| O(4)  | 44(2)           | 108(3)          | 32(2)           | 4(2)            | 12(1)           | -12(2)          |
| O(5)  | 27(2)           | 67(2)           | 72(2)           | 12(2)           | 12(2)           | -4(1)           |
| O(6)  | 67(3)           | 62(2)           | 76(3)           | -6(2)           | 26(2)           | -6(2)           |
| O(7)  | 40(2)           | 71(2)           | 72(3)           | 22(2)           | 1(2)            | 14(2)           |
| P(1)  | 28(1)           | 22(1)           | 23(1)           | 0(1)            | 7(1)            | 1(1)            |
| Cl(1) | 36(1)           | 36(1)           | 26(1)           | -1(1)           | 1(1)            | -7(1)           |
| Cl(2) | 25(1)           | 49(1)           | 38(1)           | 9(1)            | 9(1)            | 1(1)            |
| Cl(3) | 106(2)          | 132(2)          | 188(3)          | -19(2)          | 23(2)           | 6(2)            |



|       |        |        |        |        |       |        |
|-------|--------|--------|--------|--------|-------|--------|
| Cl(4) | 280(5) | 154(3) | 149(3) | 2(2)   | 56(3) | -68(3) |
| Cl(5) | 153(2) | 98(2)  | 268(4) | -18(2) | 78(3) | 23(2)  |
| Ru(1) | 24(1)  | 23(1)  | 22(1)  | 1(1)   | 5(1)  | 0(1)   |

---

**Table 5. Hydrogen coordinates [ $\times 10^4$ ] and isotropic displacement parameters [ $\text{\AA}^2 \times 10^3$ ] for 7.**

|        | x     | y     | z    | U(eq) |
|--------|-------|-------|------|-------|
| H(1)   | 6088  | 5014  | 4088 | 41    |
| H(2)   | 3997  | 4512  | 3464 | 42    |
| H(4A)  | 6890  | 6883  | 4549 | 62    |
| H(4B)  | 6370  | 7361  | 3397 | 62    |
| H(4C)  | 7128  | 6465  | 3412 | 62    |
| H(7)   | -192  | 6831  | 2253 | 48    |
| H(8)   | -559  | 6029  | 576  | 57    |
| H(9)   | 915   | 5086  | 136  | 58    |
| H(10)  | 2770  | 5025  | 1279 | 44    |
| H(15)  | -1901 | 8414  | 4605 | 41    |
| H(16)  | -387  | 8501  | 3603 | 40    |
| H(17)  | 1369  | 7969  | 8243 | 39    |
| H(18)  | -175  | 7791  | 9195 | 49    |
| H(19)  | -2159 | 7957  | 8257 | 50    |
| H(20)  | -2579 | 8194  | 6380 | 44    |
| H(25)  | 5658  | 7993  | 8240 | 44    |
| H(26)  | 5048  | 7229  | 6622 | 41    |
| H(27)  | 1576  | 9757  | 7411 | 42    |
| H(28)  | 2334  | 10667 | 8910 | 47    |
| H(29)  | 4225  | 10365 | 9971 | 55    |
| H(30)  | 5357  | 9243  | 9502 | 49    |
| H(32)  | 1533  | 8320  | 1615 | 36    |
| H(33)  | 2530  | 7216  | 859  | 36    |
| H(35)  | 5642  | 8601  | 1688 | 42    |
| H(36)  | 4619  | 9705  | 2473 | 39    |
| H(37)  | 1662  | 9664  | 2880 | 52    |
| H(38A) | 3479  | 10200 | 3923 | 145   |
| H(38B) | 2494  | 10960 | 3616 | 145   |
| H(38C) | 3558  | 10885 | 2941 | 145   |
| H(39A) | 2239  | 10706 | 1113 | 74    |
| H(39B) | 1165  | 10913 | 1742 | 74    |
| H(39C) | 1140  | 10033 | 1002 | 74    |
| H(40A) | 5689  | 7113  | 923  | 72    |
| H(40B) | 4632  | 7072  | -129 | 72    |
| H(40C) | 4574  | 6474  | 939  | 72    |
| H(41)  | 1803  | 4822  | 7552 | 146   |
